# Supplementary material
Source: PubMed Central journal article supplement (PMC7011118)
Supplement: mmc9.pdf [file mmc9.pdf]

# TTC12 Loss-of-Function Mutations Cause Primary Ciliary Dyskinesia and Unveil Distinct Dynein Assembly Mechanisms in Motile Cilia Versus Flagella

Lucie Thomas,<sup>1</sup> Khaled Bouhouche,<sup>2,19</sup> Marjorie Whitfield,<sup>3,19</sup> Guillaume Thouvenin,<sup>4,5</sup> Andre Coste,<sup>6,7</sup> Bruno Louis,<sup>7</sup> Claire Szymanski,<sup>8</sup> Emilie Bequignon,<sup>6,7</sup> Jean-François Papon,<sup>7,9</sup> Manon Castelli,<sup>2</sup> Michel Lemullois,<sup>2</sup> Xavier Dhalluin,<sup>10</sup> Valérie Drouin-Garraud,<sup>11</sup> Guy Montantin,<sup>12</sup> Sylvie Tissier,<sup>12</sup> Philippe Duquesnoy,<sup>1</sup> Bruno Copin,<sup>12</sup> Florence Dastot,<sup>12</sup> Sandrine Couvet,<sup>1</sup> Anne-Laure Barbotin,<sup>13,14</sup> Catherine Faucon,<sup>15</sup> Isabelle Honore,<sup>16</sup> Bernard Maitre,<sup>17</sup> Nicole Beydon,<sup>4</sup> Aline Tamalet,<sup>4</sup> Nathalie Rives,<sup>18</sup> France Koll,<sup>2</sup> Estelle Escudier,<sup>1,12</sup> Anne-Marie Tassin,<sup>2,20</sup> Aminata Touré,<sup>3,20,\*</sup> Valérie Mitchell,<sup>13,14,20</sup> Serge Amselem,<sup>1,12,20,\*</sup> and Marie Legendre<sup>1,12,20</sup>

Cilia and flagella are evolutionarily conserved organelles whose motility relies on the outer and inner dynein arm complexes (ODAs and IDAs). Defects in ODAs and IDAs result in primary ciliary dyskinesia (PCD), a disease characterized by recurrent airway infections and male infertility. PCD mutations in assembly factors have been shown to cause a combined ODA-IDA defect, affecting both cilia and flagella. We identified four loss-of-function mutations in *TTC12*, which encodes a cytoplasmic protein, in four independent families in which affected individuals displayed a peculiar PCD phenotype characterized by the absence of ODAs and IDAs in sperm flagella, contrasting with the absence of only IDAs in respiratory cilia. Analyses of both primary cells from individuals carrying *TTC12* mutations and human differentiated airway cells invalidated for *TTC12* by a CRISPR-Cas9 approach revealed an IDA defect restricted to a subset of single-headed IDAs that are different in flagella and cilia, whereas *TTC12* depletion in the ciliate *Paramecium tetraurelia* recapitulated the sperm phenotype. Overall, our study, which identifies *TTC12* as a gene involved in PCD, unveils distinct dynein assembly mechanisms in human motile cilia versus flagella.

## Introduction

Primary ciliary dyskinesia (PCD [MIM: 244400]) is a group of clinically and genetically heterogeneous disorders wherein dysfunction of motile cilia leads to impaired mucociliary clearance and early recurrent airway infections. About one person in 10,000 individuals is affected,<sup>1</sup> and given the key role of motile cilia in the establishment of left-right asymmetry during embryogenesis,<sup>2</sup> nearly 50% of those individuals display *situs inversus* and have Kartagener syndrome. In addition, because the microtubule-based structure of motile cilia, the axoneme, is close to that of

sperm flagella, most affected male individuals are also infertile. The axoneme consists of nine peripheral outer microtubule doublets circularly arranged around two central microtubules surrounded by a central sheath (“9+2” pattern). Attached all along the microtubule length, the outer dynein arms (ODAs), and the inner dynein arms (IDAs) are multiprotein complexes that carry an ATPase activity and provide the sliding force for motility.

In humans, ODAs are composed of two axonemal dynein heavy chains (HCs), namely the  $\beta$  and  $\gamma$  chains, which are attached to a large intermediate chain/light chain complex (IC/LC). Two types of ODAs have been

<sup>1</sup>Sorbonne Université, Institut National de la Santé et de la Recherche Médicale, U933, Hôpital Armand-Trousseau, Paris 75012, France; <sup>2</sup>Institute for Integrative Biology of the Cell (I2BC), Centre à l’Energie Atomique et aux Energies Alternatives, Centre National de la Recherche Scientifique, Université Paris-Sud, Université Paris-Saclay, Gif-sur-Yvette 91198, France; <sup>3</sup>Institut Cochin, Institut National de la Santé et de la Recherche Médicale, U1016), Centre National de la Recherche Scientifique UMR8104, Université Paris Descartes, Paris 75014, France; <sup>4</sup>Unité Fonctionnelle d’Exploration Fonctionnelle Respiratoire – Somnologie, Service de Physiologie et Explorations Fonctionnelles, Centre National de Référence des Maladies Respiratoires Rares, Hôpital Armand-Trousseau, Assistance Publique-Hôpitaux de Paris, Paris 75012, France; <sup>5</sup>Centre de Recherche Saint-Antoine, Sorbonne Universités, Paris 75012, France; <sup>6</sup>Hôpital Henri Mondor et Centre Hospitalier Intercommunal de Créteil, Service d’Oto-Rhino-Laryngologie et de Chirurgie Cervico-Faciale, Assistance Publique-Hôpitaux de Paris, Créteil 94010, France; <sup>7</sup>Faculté de Médecine, Université Paris-Est, Institut National de la Santé et de la Recherche Médicale, U955), Centre National de la Recherche Scientifique ERL7240, Hôpital Henri Mondor, Créteil 94010, France; <sup>8</sup>Service d’Oto-Rhino-Laryngologie et de Chirurgie Cervico-Faciale, Hôpital Huriez, Centre Hospitalier Universitaire Lille, Lille 59000, France; <sup>9</sup>Service d’Oto-Rhino-Laryngologie et de Chirurgie Cervico-Faciale, Hôpital Bicêtre, Assistance Publique-Hôpitaux de Paris, Le Kremlin-Bicêtre 94275, France; <sup>10</sup>Services de Pneumologie et Oncologie Thoracique et d’endoscopie respiratoire, Hôpital Calmette, Centre Hospitalier Universitaire Lille, Lille 59000, France; <sup>11</sup>Service de Génétique Médicale, Hôpital Charles Nicolle, Centre Hospitalier Universitaire-Hôpitaux de Rouen, Rouen 76000, France; <sup>12</sup>Département de Génétique Médicale, Hôpital Armand-Trousseau, Assistance Publique-Hôpitaux de Paris, Paris 75012, France; <sup>13</sup>Institut de Biologie de la Reproduction-Spermiologie-Cecos, Hôpital Jeanne de Flandre, Centre Hospitalier Universitaire Lille, Lille 59000, France; <sup>14</sup>EA4308: Gametogenesis and Gamete Quality, Université de Lille, Lille 59000, France; <sup>15</sup>Centre Hospitalier Intercommunal de Créteil, Laboratoire de Microscopie Électronique, Service d’Anatomopathologie, Créteil 94010, France; <sup>16</sup>Service de Pneumologie et Oncologie Thoracique, Hôpital Cochin, Assistance Publique-Hôpitaux de Paris, Paris 75014, France; <sup>17</sup>Service de Pneumologie, Hôpital Henri Mondor et Centre Hospitalier Intercommunal de Créteil, Assistance Publique-Hôpitaux de Paris, Créteil 94010, France; <sup>18</sup>Department of Reproductive Biology-Centre d’Étude et de Conservation du Sperme, Normandie Université, UNIROUEN, EA 4308 “Gametogenesis and Gamete Quality,” Rouen University Hospital, Rouen 76000, France

<sup>19</sup>These authors contributed equally to this work

<sup>20</sup>These authors contributed equally to this work

\*Correspondence: [aminata.toure@inserm.fr](mailto:aminata.toure@inserm.fr) (A.T.), [serge.amselem@inserm.fr](mailto:serge.amselem@inserm.fr) (S.A.)

<https://doi.org/10.1016/j.ajhg.2019.12.010>

© 2019 American Society of Human Genetics.

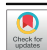

described in cilia: the type 1 ODAs are located at the proximal part of the cilium and contain DNAH5 ( $\gamma$  chain) associated with DNAH11 ( $\beta$  chain), and the type 2 ODAs are located at the distal part of the cilium and contain DNAH5 ( $\gamma$  chain) associated with DNAH9 ( $\beta$ -chain). It is worth noting that recent studies performed in humans revealed that the ODA composition of spermatozoa differs from that found in cilia:<sup>3</sup> in spermatozoa, the  $\gamma$  and  $\beta$  chains consist of DNAH8 and DNAH17, respectively, which are both specifically expressed in sperm cells. As for IDAs, their exact structure and composition is virtually unknown in humans. Most of the available knowledge was provided by studies in the flagellated alga *Chlamydomonas reinhardtii*, where seven IDA subspecies have been identified. Six distinct single-headed IDA subspecies (called IDA a, b, c, d, e, and g), each including only one HC, have been characterized, and one dimeric IDA complex (called IDA f or IDA-I1), which contains two HCs, has been identified.<sup>4–7</sup> There is growing interest in identifying the key players involved in the process of ODA and IDA assembly and transport. In this regard, one of the most frequent ciliary ultrastructural defects found in PCD is the absence of both dynein arms (DAs)<sup>8</sup> as a result of mutations in genes encoding proteins involved in ODA and IDA assembly, docking, and transport (i.e., such genes include *DNAAF2/KTU*<sup>9</sup> [MIM: 612517], *DNAAF1/LRRC50*<sup>10</sup> [MIM: 613190], *DNAAF3*<sup>11</sup> [MIM: 614566], *CCDC103*<sup>12</sup> [MIM: 614677], *DNAAF5/HEATR2*<sup>13</sup> [MIM: 614864], *LRRC6*<sup>14</sup> [MIM: 614930], *DNAAF4/DYX1C1*<sup>15</sup> [MIM: 608709], *ZMYND10*<sup>16</sup> [MIM: 607070], *SPAG1*<sup>17</sup> [MIM: 603395], *CFAP298/C21orf59*<sup>18</sup> [MIM: 615494], *PIH1D3*<sup>19</sup> [MIM: 300933], and *CFAP300/C11orf70*<sup>20</sup> [MIM: 618058]).

Although several of these genes have been renamed with the acronym DNAAF, which stands for dynein axonemal assembly factor, their precise role in the assembly and/or transport machinery is not known. As shown recently, multiciliated cells contain cytoplasmic liquid-like organelles that concentrate DNAAFs with dynein chains and chaperones.<sup>21</sup> To date, very few investigations have been performed on spermatozoa from PCD-affected individuals; in all cases, the sperm ultrastructure defects revealed by transmission electron microscopy (TEM) were always found to be identical to those reported in the cilia. In this regard, the recent observation of differences in the protein composition of ODAs between human cilia and sperm flagella<sup>3</sup> raises the question as to whether the assembly and transport mechanisms of ODA and IDA components are conserved between human cilia and flagella.

In the present study, we identified independent families in which affected individuals displayed a peculiar PCD phenotype characterized by the absence of IDAs in respiratory cilia; this phenotype was in contrast with the absence of both ODAs and IDAs in sperm. Such an unusual observation prompted us to search for the molecular basis of the PCD phenotype in those individuals and to decipher the consequences of the identified molecular defects on cilia and flagella assembly by developing an *in vivo* model

in the ciliate *Paramecium tetraurelia* and a CRISPR-Cas9-mediated genome-editing approach in human primary airway epithelial cells (AECs).

## Material and Methods

### Affected Individuals

We obtained written informed consent from all affected individuals and/or their parents according to protocols approved by the Comité de Protection des Personnes (CPP) Ile de France III (CPP02748) and the institutional review board of the French Institute of Health and Medical Research (CEEI-IRB: no. 15-259).

### Genetic Analyses

Identification of *TTC12* (GenBank: NM\_017868.4) sequence variations was performed from genomic blood DNA, either by whole-exome sequencing (WES) or by parallel sequencing with a custom targeted-capture panel. More precisely, in individual DCP791, WES was performed with the Agilent SureSelect V5 target enrichment system on a HiSeq sequencing machine (Illumina). In individuals DCP153 and DCP1606, WES was performed with the SeqCap EZ MedExome target-enrichment kit on a NextSeq sequencing machine (Illumina). The DNA of individual 18GM00157 was analyzed on a MiSeq sequencer (Illumina) with a custom targeted-capture panel (SeqCap EZ Choice, Roche Diagnostics) that encompasses the 45 genes involved in PCD and 250 candidate genes for PCD. The libraries were prepared according to the manufacturer's instructions. Data were analyzed through an in-house double pipeline based on Bowtie2 and BWA tools. Reads were visualized with the Integrative Genomics Viewer (IGV, Broad Institute). Copy-number variation was analyzed via a depth-ratio comparison between subjects sequenced in the same run, and depth ratios obtained for each of the four individuals were represented on a graph built with GraphPad Prism 5 software.

Sanger sequencing was performed on genomic blood DNA with the BigDye Terminator v3.1 system (Thermo Fisher) after PCR amplification with the Go-Taq Green Master Mix (Promega) at an annealing temperature of 60°C and purification with ExoSAP-IT(USB), according to the manufacturer's instructions. Fragments were analyzed on a 3730XL device (Thermo Fisher) after Sephadex G-50 Superfine purification (GE Healthcare). Amplification and sequencing primers are listed in [Table S1](#). Sequences were analyzed with SeqScape software (Thermo Fisher).

### TEM Analysis of Ciliary and Flagella Ultrastructure

AECs obtained from nasal or bronchial biopsies were fixed in 2.5% glutaraldehyde to be processed for TEM as previously described.<sup>22</sup> Ciliary ultrastructural results were quantified as a percentage of abnormal cilia among the total number of analyzed cilia. Semen was fixed in 2.0% v/v glutaraldehyde in phosphate buffer, washed for 15 min in fresh buffer containing 4% w/v sucrose, and embedded in 2% agar. Post-fixation lasted 1 h in 1% w/v osmic acid in phosphate buffer. After dehydration in a graded series of ethanol, small pieces of agar containing sperm cells were embedded in Epon resin (Polysciences). Sections were cut on a Reichert OmU2 ultramicrotome (Reichert-Jung AG) with a diamond knife. 70 nm sections were collected on nickel grids and stained with uranyl acetate (2% in 70% ethanol, 20 min) and Reynolds lead citrate (10 min) and examined with a Zeiss transmission

electron microscope 902 (Leo). Images were acquired with a Gatan Orius SC1000 CCD camera (Gatan France).

### Immunoblotting

AECs obtained by airway brushing from individuals 18GM00157 and DCP1606 and control individuals, as well as spermatozoa from a control donor, were suspended in ice-cold lysis buffer (50 mM Tris, 150 mM NaCl, 1% Triton X-100, and Complete Protease Inhibitor Cocktail [Roche Diagnostics]). Lysates were sonicated and cleared by 10 min of centrifugation at 1,000 × g at 4°C.

Cell lysates were loaded on 10% SDS-PAGE; proteins were then transferred for 2 h to a PVDF membrane, and analyzed via immunoblotting with TTC12 antibody (Santa Cruz sc-390229, 1/200), DNAJB13 antibody (HPA052465, 1/300), or DNAI1 antibody (HPA021649, 1/400), all incubated overnight at 4°C in PBS containing 0.1% Tween 20 and 5% milk. The secondary antibody (rabbit-HRP, SIGMA, A0545) was incubated for 1 h at room temperature at a final dilution of 1:5000 in PBS containing 0.1% Tween 20 and 5% milk. Proteins were detected with Amersham ECL Select Western Blotting Detection Reagent (GE healthcare) according to the manufacturer's recommendations.

### Immunofluorescence Analyses on AECs

All antibodies are listed in Table S2. AECs obtained via nasal brushing from individuals 18GM00157, DCP1606, and control individuals (i.e., individuals in whom the diagnosis of PCD was excluded based on the absence of sinopulmonary symptoms and of normal values of nasal nitric oxide) were suspended in FertiCult IVF medium. Samples were cytocentrifugated onto glass slides, air dried, and directly used for immunostaining. Cells were first fixed with 4% paraformaldehyde for 15 min at room temperature, washed three times with PBS++ (i.e., PBS supplemented with 0.49 mM MgCl<sub>2</sub> and 0.9 mM CaCl<sub>2</sub>), incubated for 10 min with PBS++ 50 mM NH<sub>4</sub>Cl, and permeabilized with 0.1% Triton X-100 for 10 min. Then, cells were incubated for 2 h at room temperature with primary antibodies before being revealed by secondary antibodies at room temperature for 1 h. All antibodies were incubated in PBS++ 1% BSA. Finally, cells were washed three times with PBS++ and mounted in ProLong Gold Antifade Reagent with DAPI (Cell Signaling #8961) so that nuclei would be stained, and images were taken with an ECLIPSE 80i microscope (Nikon) with a Retiga-2000R camera (QImaging).

### Immunofluorescence Analyses of Human Spermatozoa

Study participants provided semen samples via masturbation after a period of 2–7 days of sexual abstinence, evaluated according to World Health Organization (WHO) guidelines,<sup>23</sup> and then frozen until further analysis. 10 µL of frozen semen samples were spread onto a Superfrost Plus slide (Menzel Glasbearbeitungswerk) and fixed by incubation with 4% paraformaldehyde for 10 min. The slides were incubated 20 min at 95°C in citrate buffer (H-3300, VectorLabs), treated with 0.2% Triton in PBS for permeabilization, and then blocked by incubation in 1% BSA for 1 h. The slides were then incubated with primary antibodies overnight at 4°C and then with secondary antibodies for 1 h at room temperature. The slides were mounted in Vectashield medium (Vector Laboratories) supplemented with 0.5 mg/mL DAPI and were subsequently analyzed with a Zeiss Axiophot epifluorescence microscope. Digital images were acquired with a cooled charge-coupled device (CCD) camera (Hamamatsu) under identical instrument settings with MetaMorph software (Molecular Devices).

### Paramecium Experiments

All experiments were carried out with entirely homozygous mutant strains: 7S strain for feeding experiments and nd7, which carries a recessive monogenic mutation blocking trichocyst discharge,<sup>24</sup> for Paramecium transformation.

#### Paramecium Strain and Cultivation

Cells were grown at 27°C in a wheat grass powder (BHB from GSE Vertrieb GmbH) infusion medium bacterized with *Klebsiella pneumoniae* and supplemented with 0.8 µg/mL β-sitosterol according to standard procedures.<sup>25</sup>

#### Paramecium Gene-Knockdown Experiments

We used the feeding procedure previously described to achieve RNAi gene silencing.<sup>26</sup> We obtained the plasmids used in RNAi silencing experiments by cloning PCR products, which were amplified from the coding region of each gene (Table S3), in L4440 vector<sup>27</sup> via Gibson technology (Gibson DJ 2009). These plasmids were then transformed in an HT115 DE3 *Escherichia coli* strain to produce T7Pol-driven dsRNA as previously described.<sup>26</sup>

#### Microinjection of a Transgene Expressing a GFP-Tagged TTC12a Protein

To create a version of *TTC12a* that would be resistant to RNAi silencing, we replaced the sequence from nucleotide 471 to 745 (corresponding to dsRNA sequence) of the *TTC12a* coding region *in vitro* by a modified synthetic DNA sequence coding for the same amino acid sequence (Figure S1). The GFP coding sequence was fused at the 3' end of WT or *TTC12a* RNAi-resistant versions and cloned (via Gibson technology [Gibson DJ 2009]) in the XhoI site of the pPXV-GFP vector under the control of the constitutive regulators of the *Paramecium* calmodulin gene.<sup>28</sup> Twelve nucleotides coding for four glycine amino acids were introduced between the *TTC12a*-coding region and the GFP-coding sequence. The plasmid was linearized by SfiI digestion and microinjected along with ND7-complementing plasmid into the macronucleus of nd7-1 mutant cells unable to discharge their trichocysts.<sup>24</sup> Transformants were first screened for their ability to discharge trichocysts, and if they had this ability, they were further analyzed. Microinjection was performed under an inverted Nikon phase-contrast microscope via a Narishige micromanipulation device and an Eppendorf air pressure microinjector.

#### Paramecium TEM Analysis

For ultrastructural observations, paramecia were permeabilized in PHEM buffer (60 mM PIPES, 25 mM HEPES, 10 mM EGTA, and 2 mM MgCl<sub>2</sub>, adjusted to pH 6.9 with NaOH) with 1% Triton X-100 for 1 min, rinsed in PHEM buffer, and fixed in 1% (v/v) tannic acid and 1% (v/v) glutaraldehyde in PHEM buffer for 30 min. Cells were then rinsed in PHEM and 0.05 M cacodylate buffers before being postfixed in 1% OsO<sub>4</sub> (v/v) 0.05 M cacodylate buffer at pH 7.4 for 30 min. After being rinsed, cells were embedded into 2% agarose. Agar blocks were then dehydrated in graded series of ethanol and propylene oxide and embedded in Epon. Ultrathin sections were contrasted with uranyl acetate and lead citrate. The sections were examined with a Jeol transmission electron microscope 1400 (at 120 kV). The number of ODAs and IDAs were counted in about 140 cilia cross-sections obtained from TTC12-knocked-down or control cells.

#### Paramecium Swimming Speed and Cell Trajectory

We analyzed paramecia swimming behavior of TTC12-depleted and control cells by transferring 8–10 paramecia into a drop of conditioned BHB medium and imaging them for 10 s every 0.3 s to assess the swimming pattern under dark-field microscopy by using MetaVue software. Image analysis and the measurement of

| Individuals (Origin)       | Known Consanguinity | Gender at Diagnosis | Airway Disease |                                     |                        | Fertility   | Nasal NO (nL/min) | TEM Defect (%)                    |                   | Allele 1                | Allele 2                |
|----------------------------|---------------------|---------------------|----------------|-------------------------------------|------------------------|-------------|-------------------|-----------------------------------|-------------------|-------------------------|-------------------------|
|                            |                     |                     | SI             | Lower                               | Upper                  |             |                   | Cilia                             | Sperm             |                         |                         |
|                            |                     |                     |                |                                     |                        |             |                   |                                   |                   |                         |                         |
| <b>DCP791</b> (Turkey)     | yes                 | male (24 years)     | no             | minima                              | sinusitis              | infertility | low <sup>a</sup>  | NA                                | IDAs+ ODAs (100%) | c.1614+3A>T (p.?)       | c.1614+3A>T (p.?)       |
| <b>18GM00157</b> (Morocco) | yes                 | female (50 years)   | no             | asthma bronchiectasis               | rhino-sinusitis        | not tested  | 37.6              | IDAs (100%) disorganization (22%) | NR                | c.1678C>T (p.Arg560*)   | c.1678C>T (p.Arg560*)   |
| <b>DCP1606</b> (Tunisia)   | yes                 | male (11 years)     | no             | NNRD, bronchiectasis, pneumopathies | rhino-sinusitis otitis | NR          | 146               | IDAs (100%) disorganization (24%) | NR                | c.607del (p.Ile203*)    | c.607del (p.Ile203*)    |
| <b>DCP153</b> (Europe)     | no                  | male (33 years)     | no             | bronchitis                          | rhino-sinusitis        | Infertility | 186               | IDAs (100%) disorganization (2%)  | IDAs+ODAs (100%)  | c.1700T>G (p.Met567Arg) | c.1700T>G (p.Met567Arg) |

Abbreviations are as follows: NNRD, neonatal respiratory distress; NR, not relevant; NO, nitric oxide; NA, not available; TEM, transmission electron microscopy; IDAs, inner dynein arms, and ODAs, outer dynein arms. PCD nasal NO < 77 nL/min.<sup>8</sup>

<sup>a</sup>Exact value not available.

swimming velocity were then performed with the ImageJ software.

#### Paramecium Fluorescence-Microscopy Analysis

Immunofluorescence (IF) was performed as follows: paramecia were fixed in 2% paraformaldehyde in PHEM buffer for 15 min. Cells were then permeabilized for 15 min in 1% Triton X-100 in PHEM and washed three times in PBS supplemented with 3% BSA. Immunostaining was performed with a polyglutamylated tubulin antibody (kindly provided by Carsten Janke, 1/500) as previously described.<sup>29</sup> Cells were observed with a confocal Leica SP8 microscope, and image stacks were processed with the ImageJ and Photoshop softwares.

#### Paramecium Deciliation, Protein Extraction, and Immunoblot

Cilia were purified<sup>30</sup> and recovered by centrifugation at 28,000 × g for 30 min, and protein was directly extracted in SDS-Laemmli buffer. Total protein content from paramecia or paramecia cell bodies (deciliated paramecia) was directly boiled in 10% SDS, followed by dilution in 2XSDS Laemmli buffer. Proteins were then separated on SDS-PAGE, blotted on a nylon membrane, and probed with an anti-GFP antibody (1:1,000, Interchim).

#### Air-Liquid Interface Culture and Infection

AECs obtained either from surgical material from non PCD-affected individuals suffering from nasal polyps requiring surgery or from nasal brushing of PCD-affected individuals were cultured at the air-liquid interface (ALI) as previously described.<sup>31</sup> In brief, epithelial cells were seeded in 12-well collagen IV-coated transwell inserts (Costar, coming) and cultured in PneumaCult-Exp Plus medium (#05040, Stem Cell) until confluence was reached. The medium was then removed from the apical surface and replaced in the basal chamber by the PneumaCult-ALI medium (#5001, Stem Cell) so that cells would be exposed to an air-liquid interface that promoted ciliogenesis during the following 21 days. Lentiviral transduction of AECs was performed as previously described.<sup>32</sup> In brief, viral particles together with a Rho-associated protein kinase inhibitor were added to the medium during the expansion phase before a cell-selection step with the use of puromycin (2 μg/mL). Resistant cells were then cultured at the ALI as described above. Cells infected with an empty vector were used as a control.

## Results

### Next-Generation Sequencing-Based Approaches Identify Homozygous Loss-of-Function *TTC12* Mutations in Four Independent PCD-Affected Individuals with Distinct Ciliary and Flagellar DA Defects

To uncover novel genetic causes responsible for PCD, we used a next-generation sequencing (NGS)-based approach in four independent probands with a PCD phenotype that was not explained by mutations in genes known to be involved in PCD. As summarized in Table 1, individuals DCP791, 18GM00157, and DCP1606 originate from North Africa and were born from a consanguineous union, whereas the fourth individual, DCP153, originates from Europe and has parents with no known consanguinity. All four individuals displayed sinopulmonary symptoms with rhino-sinusitis and had normal *situs* position. Individuals 18GM00157 and DCP1606 also displayed

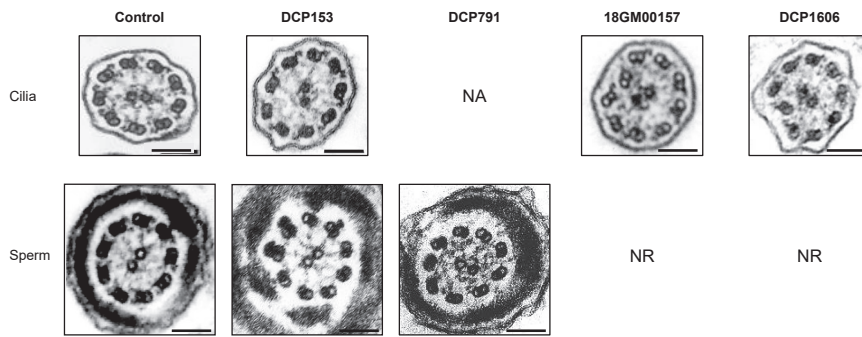

**Figure 1. Ciliary and Flagellar Ultrastructural Defects in PCD-Affected Individuals with *TTC12* Mutations**

Electron micrographs of cross-sections of ciliary axonemes (upper panel) from a control individual and individuals DCP153, 18GM00157, and DCP1606 are compared to those of cross-sections of sperm flagellar axonemes (lower panel) from a control individual and from the infertile PCD-affected individuals DCP153 and DCP791. In each individual, the ciliary section shows an abnormal configuration with missing IDAs and an associated mild axonemal disorganization in individuals

18GM00157 and DCP1606, but ODAs are clearly present. The flagellar sections show a lack of both IDAs and ODAs. Black scale bars represent 0.1  $\mu\text{m}$ . Abbreviations are as follows: NR, not relevant; NA, not available.

bronchiectasis, and individual DCP1606 suffered from neonatal respiratory distress. Nasal nitric oxide (NO) concentrations were recorded for those four individuals and showed low levels for two of them. High-speed videomicroscopy (HSVM) performed on nasal brushings of three individuals showed variable proportions of immotile cilia (70%, 50%, and 10% in 18GM00157, DCP1606, and DCP153, respectively); a normal beat frequency and moderate beating defects (for the portion of motile cilia) consisting of a reduced beating angle; and a lower distance swept by the cilium tip (Table S1). Representative videos showing immotile and beating cilia are shown in the supplemental data (Videos S1 and S2; S3 and S4; and S5 and S6 for individuals 18GM00157, DCP1606, and DCP153, respectively, and Video S7 for a control individual). TEM analysis of respiratory cilia was performed for individuals DCP153, 18GM00157, and DCP1606 and showed the absence of IDAs associated with some axonemal disorganization (2%, 22%, and 24%, respectively) but also, importantly, the presence of ODAs in all examined cilia (Table 1) (Figure 1).

Among the three male individuals, individual DCP1606 was a child (11 years old), and individuals DCP791 and DCP153 were adults known to be infertile as a result of total asthenozoospermia (Table 2). Surprisingly, TEM analysis of sperm cells from the two infertile individuals revealed the total lack of both IDAs and ODAs, an ultrastructural phenotype clearly different from that observed in cilia from respiratory cells where only IDAs were missing.

NGS analyses led to the identification of homozygous mutations in *TTC12* [MIM: 610732], a gene that has so far not been associated with PCD. *TTC12* is located on chromosome 11 and consists of 22 coding exons (GenBank: NM\_017868.4), suggesting a protein of 705 residues (UniProt: Q9H892). Individuals DCP1606 and 18GM00157 were shown to carry the nonsense mutations c.607del (p.Ile203\*) and c.1678C>T (p.Arg560\*), respectively. Individual DCP791 carried a splice mutation (c.1614+3A>T, p.?) and individual DCP153 was homozygous for the missense mutation c.1700T>G (p.Met567Arg). Two of these mutations, c.1614+3A>T and c.607del, are not reported in gnomAD, and the

c.1678C>T and c.1700T>G mutations are found at very low frequencies:  $4 \times 10^{-5}$  and  $6 \times 10^{-5}$ , respectively (Table S4). The presence of all these *TTC12* mutations was confirmed by Sanger sequencing, as illustrated in Figures S2 and S3. The expected consequences of the identified variants at the protein level are shown in Figure 2.

### ***TTC12* Is a Cytoplasmic Protein of Ciliated Cells**

*TTC12* contains three tetratricopeptide repeat (TPR) domains in its N-terminal part and three armadillo repeat domains (ARM1, ARM2, and ARM3) in its C-terminal part. A TPR domain consists of a motif of ~34 amino acids organized in two antiparallel alpha helices known to mediate protein-protein interactions and the assembly of multiprotein complexes.<sup>34</sup> ARM domains, which are approximately 40 amino acids long, have also been implicated in protein-protein interactions through their superhelix structure.<sup>35</sup> To date, the biological functions of *TTC12* are unknown. To gain insight into its role, we first checked *TTC12* tissue expression by RT-PCR in AECs and in testis tissue (Figure S4A) with a primer set (located in exons 2 and 22) bracketing the entire coding region (Table S1). Sequencing of the resulting RT-PCR products allowed the identification of the same *TTC12* isoform (GenBank: NM\_017868.4) in both samples. As shown by real-time PCR performed with primers located in exons 11 and 12 of *TTC12* (Table S1), a similar expression level of this transcript was found in AEC and testis samples (Figure S4B). The corresponding *TTC12* 75 kDa protein was also easily detectable by immunoblot in both cell types (Figure S4C). We next investigated the subcellular localization of *TTC12* in ciliated cells. Given the absence of available anti-*TTC12* antibodies suitable for IF studies, we performed immunoblot experiments on protein extracts from ciliary or cytoplasmic fractions of cultured AECs. This analysis showed that *TTC12* is virtually exclusively detected in the cytosolic fraction; in contrast, DNAJB13, a component of radial spokes, was mainly detected in the ciliary fraction, as expected (Figure S4D). These results are in line with data from quantitative proteomic analyses, which did not identify *TTC12* in purified preparations of axonemes from human airway cells.<sup>36</sup>

**Table 2. Semen Characteristics of Infertile Individuals with Identified *TTC12* Mutations**

| Individuals                   | pH  | Volume (ml) | Sperm Count (10 <sup>6</sup> /mL) | Total Motility (%) | Progressive Motility (%) | Vitality (%) | Typical Forms (%) | Flagellum Defects |       |                   |        |          |
|-------------------------------|-----|-------------|-----------------------------------|--------------------|--------------------------|--------------|-------------------|-------------------|-------|-------------------|--------|----------|
|                               |     |             |                                   |                    |                          |              |                   | Absent            | Short | Irregular Caliber | Coiled | Multiple |
| DCP791                        | ND  | ND          | 21                                | 0 <sup>b</sup>     | 0 <sup>b</sup>           | 75           | 36                | 7                 | 0     | 0                 | 10     | 0        |
| DCP153                        | 7.9 | 4.5         | 81                                | 0 <sup>b</sup>     | 0 <sup>b</sup>           | 68           | 33                | 2                 | 1     | 1                 | 6      | 1        |
| Reference values <sup>a</sup> | 7.2 | 1.5         | 15                                | 40                 | 32                       | 58           | 23                | 5                 | 1     | 2                 | 17     | 1        |

Values are expressed in percent, unless otherwise specified. ND: not determined.

<sup>a</sup>According to the World Health Organization (WHO) standards<sup>23</sup> and the distribution range of morphologically abnormal spermatozoa observed in fertile individuals.<sup>33</sup>

<sup>b</sup>Abnormal values.

Overall, the cytoplasmic localization of *TTC12* indicates that this protein is not a structural component of the axoneme but might play a role in the assembly and/or the transport of axonemal components.

### Functional Consequences of the Identified *TTC12* Mutations

The nonsense mutations carried by individuals 18GM00157 and DCP1606 might generate truncated proteins lacking the ARM superhelix structure of *TTC12* (Figure 2). Such premature stop codons might also trigger the nonsense-mediated mRNA decay pathway and therefore might lead to the absence of protein. To test these hypotheses, we cultured AECs from individuals 18GM00157 and DCP1606 and from a control individual at the ALI as previously described.<sup>31</sup> Analysis of total protein extracts by immunoblotting with an antibody raised against the N-terminal part of *TTC12* led to the detection of *TTC12* in the control but not in samples from individuals 18GM00157 and DCP1606 (Figure 3A). These results clearly indicate that the two nonsense mutations identified in individuals 18GM00157 and DCP1606 are associated with *TTC12* loss of function.

As for individual DCP153, he carries a missense variation replacing methionine 567, located in the second ARM domain of *TTC12*, by an arginine residue. Several lines of evidence support the involvement of the p.Met567Arg variation in the PCD phenotype of this individual. First, as mentioned above, this variation is reported in gnomAD at a very low frequency ( $6 \times 10^{-5}$ ) and only in the heterozygous state (Table S5). Second, it predicts changes in both the polarity and the charge of this amino acid that is highly conserved in mammals. In zebrafish and *Xenopus*, this methionine residue is replaced by a leucine, an amino acid that is also apolar (Figure S5A). In addition, alignments of the well-conserved ARM2 and ARM3 domains of *TTC12* with the ten ARM domains found in *ARMC4*—also involved in PCD<sup>37</sup>—unveil (1) that the methionine found in ARM2 at position 567 also corresponds to a methionine in the ARM3 domain (Met610) (Figure S5B) and (2) the high conservation among all those ARM domains of a hydro-

phobic residue at a position corresponding to Met567 in *TTC12* (Figure S5C). Third and most importantly, in immunoblot analyses on protein extracts from AECs and from spermatozoa of individual DCP153, who carries the missense mutation in the homozygous state, the amount of *TTC12* was found to be dramatically reduced (Figures 3A and 4B), thereby attesting to the pathogenicity of the p.Met567Arg mutation.

The last individual, DCP791, carries the c.1614+3A>T transversion involving the splice-donor site of *TTC12* intron 18. As predicted by the MaxEntScan webtool, this nucleotide substitution is expected to have a strong impact on the splicing of *TTC12* transcripts (score decreasing from 9.49 to 2.03). In addition, a recent study described a deep neural network that precisely models mRNA splicing from a genomic sequence and accurately predicts the effects of all possible genomic SNVs on splicing.<sup>38</sup> On the basis of this dataset, the probability that the *TTC12* c.1614+3A>T mutation alters the intron 17 canonical splice site is 88%. To further confirm the deleterious effect of this mutation on splicing, we generated minigene constructs containing a genomic DNA region spanning exons 17 to 19 of *TTC12*, with or without the A>T transversion. Analysis of the corresponding transcripts in HEK293 cells transfected with those plasmid constructs showed that the mutation induces a complete skipping of exon 18 (Figures S6A and S6B). This in-frame deletion of exon 18 spares the exons encoding the ARM2 and ARM3 domains but, as shown with the NCBI CDD webtool, the prediction of those domains is lost (Figure S6C).

### *TTC12* Mutations Affect a Subset of Single-Headed IDAs in Respiratory Cilia

To further investigate the function of *TTC12* in respiratory cilia and in sperm flagella, we first used high-resolution IF to compare the localization of different axonemal components in AECs from three individuals (18GM00157, DCP1606, and DCP153) to their localization in controls. We used DNAH5 and DNAI1 as markers of the ODAs; DNAH2 and DNAH10 for the double-headed IDA-I1 complex; RSPH3 and RSPH4a for radial spokes (RSs); GAS8 for

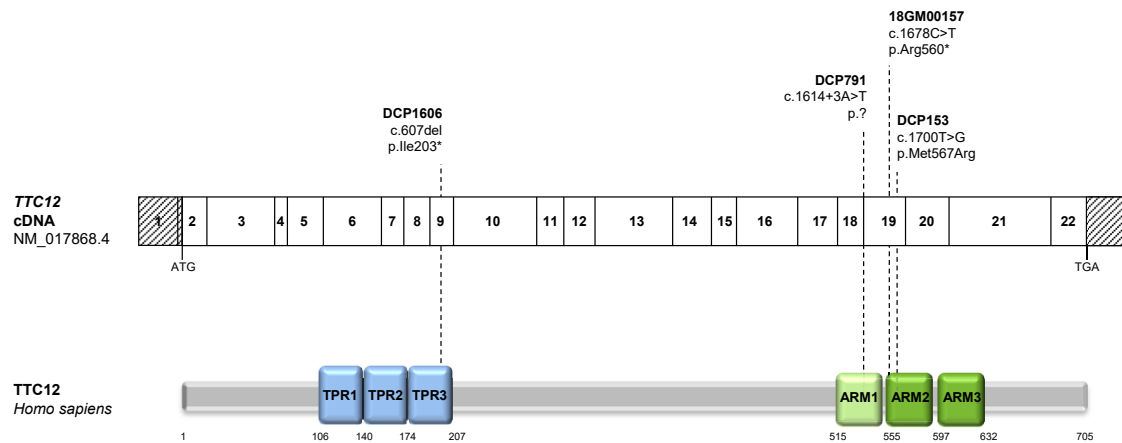

**Figure 2. *TTC12* Mutations and Their Putative Impact at the Protein Level in Individuals with PCD**

The mutations are shown within the exonic organization of the human *TTC12* cDNA (top) and a domain-organization model of the corresponding protein (bottom) according to the SMART webtool and CDD NCBI database. Abbreviations are as follows: TPR, tetratricopeptide repeat; and ARM, armadillo repeat. The light green box represents a degenerated ARM domain, and the two dark green boxes correspond to typical ARM domains.

the nexin-dynein regulatory complex (N-DRC); and CCDC40 for the ciliary ruler.<sup>39</sup> As proposed by Kollmar,<sup>40</sup> the single-headed IDA subspecies (a, b, c, d, e, and g) would result from gene duplications followed by the generation of highly divergent N termini and the formation, in *Chlamydomonas* but not in mammals, of chimeric single-headed heavy dynein chains. This model, which relies on thorough phylogenetic analyses, readily explains the fact that the single-headed IDAs a, c, and d bind the light-chain DNALI1 (both in *Chlamydomonas* and in humans), whereas the heavy chains belonging to another subgroup (b, e, and g) bind centrin in *Chlamydomonas*, and in humans, the b and e heavy chains, which are not chimeric, would bind DNALI1. We therefore performed immunostaining with antibodies directed against DNALI1 (corresponding to IDA subspecies a, c, and d and potentially to IDA subspecies b and e), DNAH1 (corresponding to IDA subspecies d), DNAH6 (corresponding to IDA subspecies g), and DNAH12 and DNAH3, both corresponding to other IDA subspecies (a, b, c, or e). We found that, in the respiratory cilia of the three individuals with *TTC12* mutations, the subcellular localization patterns of the markers for ODAs, radial spokes (RSs), the nexin-dynein regulatory complex (N-DRC), and the ciliary ruler were similar to those found in controls (Figure S7). Interestingly with regard to IDAs, although DNAH2 and DNAH10, corresponding to the double-headed IDA-I1, were found to be normal in those same three individuals (Figure S7), all the markers of the single-headed IDA subspecies (i.e., DNALI1, DNAH1, DNAH6, and DNAH12) displayed an abnormal pattern (Figure 3B). DNALI1, DNAH1, and DNAH6 were present at low levels in the very proximal part of the cilia from the three individuals and absent from the rest of the axoneme, whereas DNAH12 was not detectable all along the cilia and was found to accumulate at the subapical part of the cytoplasm of ciliated cells. Overall, in cilia, *TTC12* mutations do not affect ODAs or IDA-I1 but

compromise a single-headed-IDA subset, which comprises DNALI1, DNAH1, DNAH6, and DNAH12. Of note, DNAH3 was not detected in cilia from control individuals (data not shown).

### ***TTC12* Mutations Affect ODAs and a Distinct Subset of Single-Headed IDAs in Sperm Flagella**

In line with the TEM data, IF analyses in spermatozoa from the infertile PCD-affected individual DCP153 showed that DNAI1 as well as DNAH8 and DNAH17, the two dynein HCs specific to ODAs in sperm flagella,<sup>3</sup> were undetectable (Figure 4A), thus clearly confirming that *TTC12* mutations induce a loss of ODAs in sperm cells but not in airway cilia. Because very little information on the IDA subtypes and their HC composition is available in human sperm cells, we analyzed the pattern of all described IDA HCs in humans (except DNAH7 and DNAH14, for which no antibodies are so far suitable for IF). Interestingly, as observed in cilia, markers of the double-headed IDA-I1 complex (i.e., DNAH2 and DNAH10) were found unchanged in individual DCP153. Regarding markers of single-headed IDAs, although the dynein HC DNAH3 (a, b, c, or e) was not detected in control respiratory cilia, it was found along the axoneme of control spermatozoa. Remarkably, this dynein HC was totally absent in sperm from individual DCP153. Additionally, DNAH12 (also corresponding to the single-headed IDA subspecies a, b, c, or e) was detected along the full length of the flagellar axoneme in a control but displayed an expression pattern restricted to the proximal part of the flagella in the affected individual DCP153 (Figure 4A). By contrast, the dynein HCs of the single-headed IDA subspecies d and g (i.e., DNAH1 and DNAH6) displayed a normal expression pattern (Figure S8). As for DNALI1, the light chain associated with the IDA subspecies a, c, and d, it was found to be normally localized along the flagellar axoneme of spermatozoa from the affected individual DCP153; however, the IF

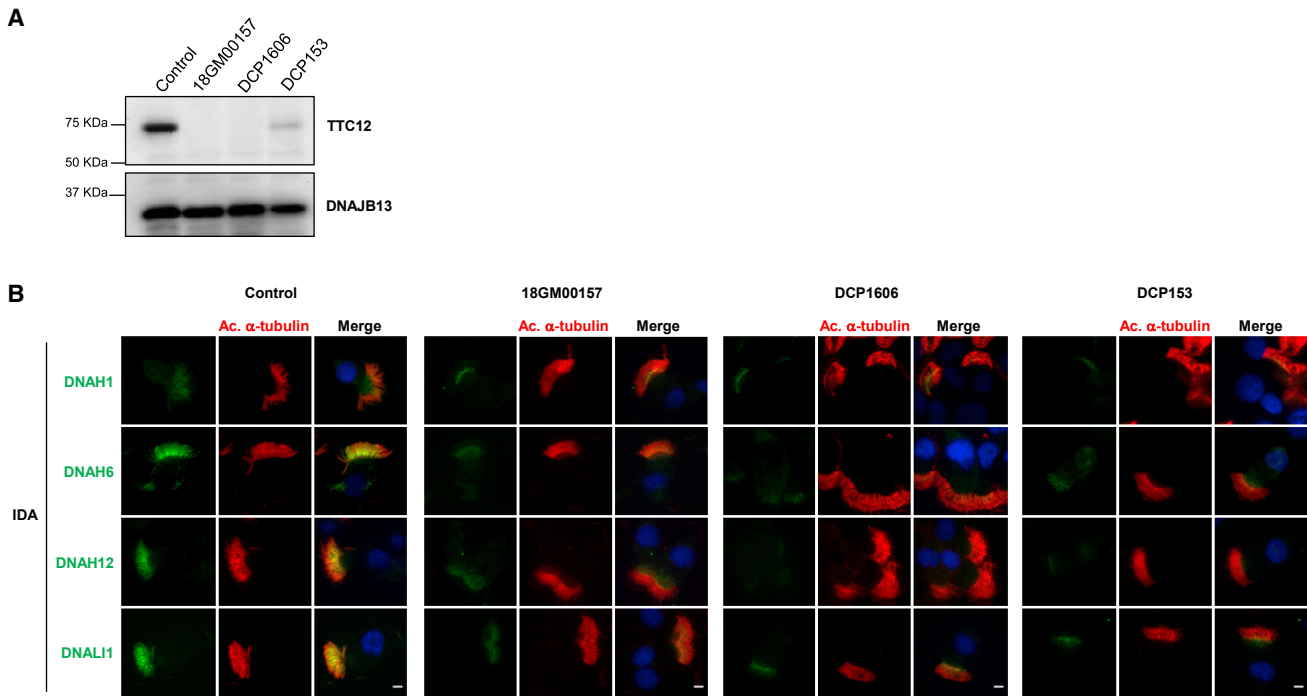

**Figure 3. TTC12 Loss-of-Function Mutations Cause Defective Single-Headed IDA Assembly in Respiratory Cilia**

(A) Protein lysates extracted from AECs of a control individual and individuals 18GM00157, DCP1606, and DCP153 were resolved by SDS-PAGE and analyzed by immunoblotting with an anti-TTC12 antibody. The expression of TTC12 is virtually absent or dramatically reduced in PCD-affected individuals. DNAJB13, a component of radial spokes, was used as a positive control.

(B) IF microscopy analysis of IDA markers in respiratory epithelial cells from a control and from individuals 18GM00157, DCP1606, and DCP153 homozygous for *TTC12* mutations. Cells were double-labeled with an anti-acetylated  $\alpha$ -tubulin antibody (red), a marker of ciliary axonemes, and anti-DNAH6, anti-DNAH12, or anti-DNALI1 antibodies as markers of IDAs (green). Nuclear staining was performed with DAPI (blue). In affected individuals, DNAH12 is completely absent in the cilia but seems to accumulate at the subapical part of the cytoplasm. By contrast, DNALI1 and DNAH6 appear to be strongly reduced but are partially present at the proximal part of cilia. (DNAH2 and DNAH10, two markers of the double-headed IDA-II, were shown to be normally expressed in the individuals; see Figure S7). Scale bars represent 5  $\mu$ m. IDA: inner dynein arm.

signal intensity appeared to be reduced (Figure 4A), a result confirmed by an immunoblot performed with an anti-DNALI1 antibody on protein extracts from the individual's spermatozoa (Figure 4C). Taken together, these data demonstrate that in sperm cells from individuals with *TTC12* mutations, the assembly and/or the transport of ODAs and an IDA subset comprising DNALI1, DNAH3, and DNAH12 are compromised, whereas IDA-II remains intact.

#### TTC12-Depleted *Paramecium* Reproduce the Spermatozoa Phenotype Observed in PCD-Affected Individuals

To further investigate the function of TTC12 in cilia motility, we undertook studies in the free-living ciliate *Paramecium tetraurelia*, which is a powerful model organism with which to characterize potential functions of PCD candidate genes<sup>41,42</sup> because gene functional analysis by RNA interference silencing is rapid, efficient, and easy to perform. Gene homology analyses performed on the *P. tetraurelia* genome<sup>28</sup> identified four genes putatively encoding TTC12; these genes are GSPATT00036969001, GSPATT00034215001, GSPATT00035675001, and GSPATT00037155001, hereafter named *TTC12a*, *TTC12b*, *TTC12-like a*, and *TTC12-like b*,

respectively. Interpro software analysis detected both TPR and ARM repeats in *TTC12a* and *TTC12b* only. Therefore, we focused our analysis on these two proteins, which are the closest orthologs of human *TTC12* (Figure S9). RNA-seq analysis showed that *TTC12a* is highly expressed in comparison to *TTC12b* and is the only paralog overexpressed during ciliogenesis (Table S6)<sup>43,44</sup>. By generating a GFP-tagged *TTC12a* protein in *paramecia*, we showed that, as observed in human cells, *TTC12a* is a cytoplasmic protein (Figure S10). We used the dsRNA feeding method to silence *TTC12a*, *TTC12b*, and the combination *TTC12a+TTC12b*. The knockdown (KD) of *TTC12a* alone or in association with *TTC12b* led to a dramatic defect in the swimming velocity (Figures 5A and 5B) and subsequent cell death. By contrast, cells that were knocked down for *TTC12b* showed no obvious abnormal swimming phenotype, indicating that only *TTC12a* is essential for cilia motility (Figures 5A and 5B). The swimming velocity and cell death observed in *TTC12a*-depleted cells were rescued by the expression of an RNAi-resistant version of the gene (Figures 5C 5D, and 5E), confirming that the observed phenotypes are specific to *TTC12* knockdown. Cilia-staining IF and TEM indicated that in *Paramecium TTC12a+b* KD cilia



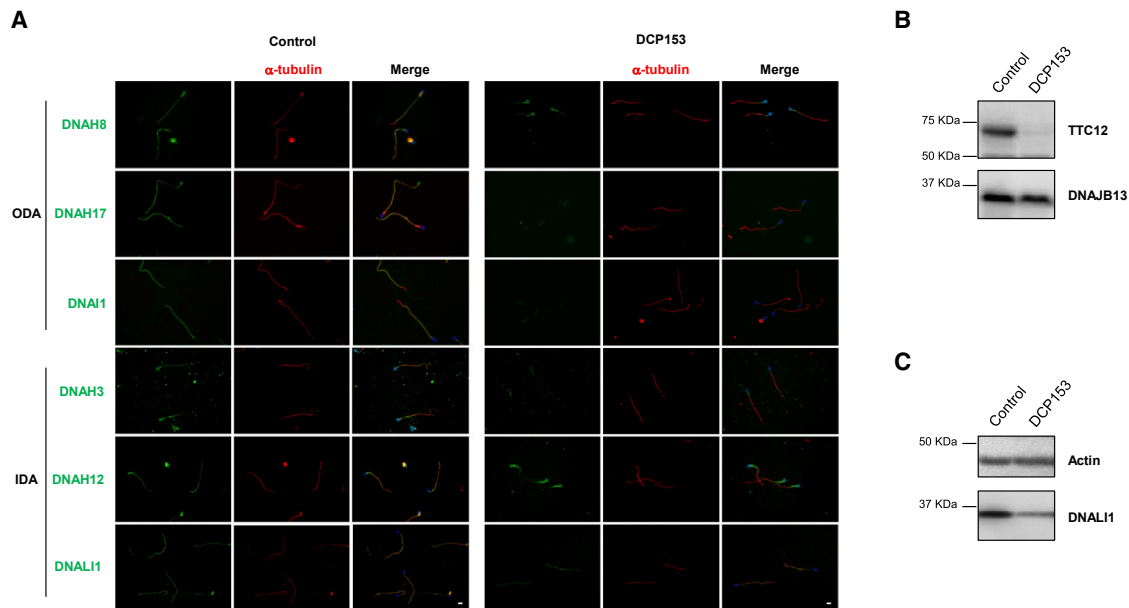

**Figure 4. *TTC12* Mutations Impact the Assembly of Both ODAs and IDAs in Spermatozoa**

(A) IF microscopy analysis of ODA and IDA markers in spermatozoa from a control and the infertile individual DCP153 carrying bi-allelic *TTC12* mutations. Cells were double-labeled with a marker of ciliary axonemes and anti- $\alpha$ -tubulin antibody (red), together with anti-DNAH8, anti-DNAH17, or anti-DNAI1 antibodies as markers of ODAs (green) and anti-DNAH3, anti-DNAH12, or anti-DNALI1 antibodies as markers of IDAs (green). Nuclear staining was performed with DAPI (blue). In individual DCP153, DNAH8, DNAH17, DNAI1, and DNAH3 are absent along the flagellar axoneme. By contrast, DNAH12 remains exclusively present in the proximal part of flagella, and DNALI1 appears to be present but reduced along the axoneme. Scale bars represent 5  $\mu$ m.

(B) Spermatozoa protein lysates of a control individual and individual DCP153 were resolved by SDS-PAGE and analyzed by immunoblotting with an anti-TTC12 antibody, showing the absence of TTC12 expression in the individual. Very low amounts of TTC12 were detected in spermatozoa from the infertile individual DCP153. DNAJB13, a component of radial spokes, was used as a positive control.

(C) Spermatozoa protein lysates of a control individual and individual DCP153 were resolved by SDS-PAGE and analyzed by immunoblotting with an anti-DNALI1 antibody, showing the reduced amounts of DNALI1 in flagella from the affected individual. Actin was used as a positive loading control. Abbreviations are as follows: ODA, outer dynein arm; and IDA, inner dynein arm.

were globally intact (Figure 6A) but contained a reduced number of ODAs and/or IDAs per cilium (Figure 6B). Similar results were obtained after depletion of the *TTC12a* protein alone (data not shown). Taken together, these data indicate that, similarly to what we found in human spermatozoa, the assembly and/or transport of both ODAs and IDAs was affected by the absence of *TTC12a* in the *Paramecium* model, which suggests that the function of this protein is at least partly conserved throughout evolution.

#### CRISPR-Cas9-Mediated *TTC12* Inactivation in AECs Leads to Single-Headed IDA Subspecies Defects Mimicking the Phenotype of AECs from Individuals with *TTC12* Mutations

In order to further assess the consequences of *TTC12* loss-of-function mutations in airway ciliated cells, we inactivated *TTC12* in the model of primary AECs cultured at ALI<sup>31</sup> through a CRISPR-Cas9 approach. Control AECs were transduced with lentiviruses expressing plentiCRISPRv2 carrying Cas9 and RNA guides (gRNA) targeting *TTC12*. Two gRNAs targeting exon 3 were tested, and the most effective one, gRNA 1 (i.e., with the higher level of insertions or deletions as assessed by TIDE webtool), was used for further experiments.

Genomic DNA (gDNA) was then extracted from ALI cultures transduced with gRNA 1. We found that 82% of gDNA carried indels, including 28% of single-nucleotide insertions (Figure S11A and S11B). *TTC12* inactivation in AECs was confirmed by immunoblot (Figure S11C), thereby allowing us to investigate the functional effects of such inactivation on the main axonemal components. IF staining of *TTC12*-inactivated cultured epithelial cells revealed a phenotype similar to that found in primary cells from individuals with *TTC12* mutations; only axonemal components specific to single-headed IDAs (i.e., DNAH1, DNAH6, DNAH12, and DNALI1) were found to be affected (Figures 7A and 7B). More specifically, the analysis of ciliated cells cultured in ALI by high-resolution IF confirmed the inactivation of *TTC12* in clusters with a combination of ciliated cells lacking DNAH6, DNAH12, and DNALI1 along the cilia length and ciliated cells with normal staining (Figure 7A). Moreover, analysis of isolated ciliated cells confirmed the data obtained in AECs from individuals with *TTC12* mutations; the abnormal localization of DNAH1, DNAH6, and DNALI1 was found at very low levels at the base of the cilia, and DNAH12 was completely absent all along the cilia (Figure 7B). All the other tested axonemal components displayed a normal staining (i.e., DNAH5,

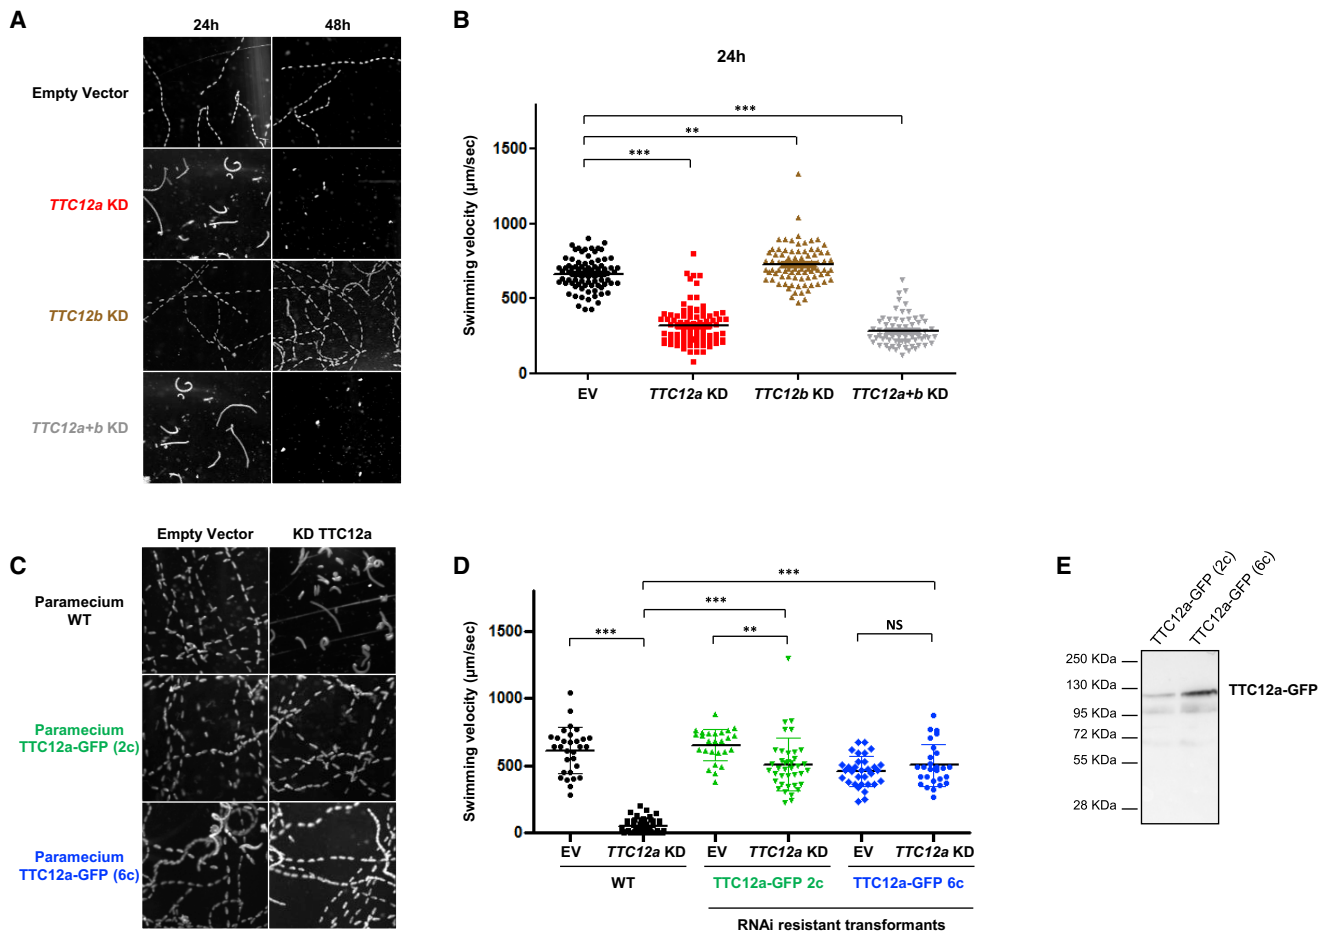

**Figure 5. Knockdown of *TTC12a* Affects the Swimming Velocity of Paramecia**

(A) Z projection of track recording paramecia swimming under a dark-field microscope with a 10× objective lens after 24 h or 48 h of RNAi treatment. At 24 h of silencing, swimming behavior was affected in *TTC12a*- and *TTC12a+b*-silenced cells, whereas the silencing of *TTC12b* did not show any swimming defect. At 48 h, *TTC12a*- and *TTC12a+b*-silenced cells did not swim anymore, and they died at 72 h.

(B) Analysis of the swimming velocity of *TTC12a*, *TTC12b*, and *TTC12a+b* KD cells as well as control paramecia (i.e., empty vector silenced paramecia). Note that *TTC12b*-depleted cells swam slightly faster (725 mm/s) than control cells (EV, 665 mm/s). The swimming velocity of *TTC12a* (317 mm/s) and *TTC12a+b* (282 mm/s) KD cells was reduced to 50% of that of control cells at 24 h. Data are represented as the mean ± SEM. Statistical analyses were performed with GraphPad Prism v5 software through the use of two-tailed unpaired t tests, \*\*\**p* < 0.001, \*\**p* < 0.01, (*n* = 69–88 per experiment).

(C) Z projection of track recording paramecia swimming under a dark-field microscope equipped with a 10× objective lens. Clones transformed by an RNAi-resistant version of *TTC12a* (2c and 6c) as well as non-transformed paramecia were grown for 36 h in an empty-vector silencing medium or in a *TTC12a*-silencing medium. *TTC12a*-depleted cells barely swam, as shown previously, whereas cells expressing an RNAi-resistant version of *TTC12a* again swam similarly to control cells. This indicates that *TTC12a*-depleted phenotypes are rescued by the *TTC12a* RNAi-resistant version.

(D) Analysis of the swimming velocity of transformed and non-transformed cells grown in an empty-vector silencing medium or in a *TTC12a*-silencing medium. As expected, *TTC12a* silencing in non-transformed cells dramatically reduced the swimming velocity (52 mm/s). However, the expression of the *TTC12* RNAi-resistant version rescues this phenotype (88% of complementation). Note that the swimming velocity of transformed 2c cells (653 mm/s) was similar to that of non-transformed paramecia (612 mm/s), while transformed 6c cells swam slower (458 mm/s). Data are represented as the mean ± SEM. Statistical analyses were performed with GraphPad Prism v5 software and two-tailed unpaired t tests. \*\*\**p* < 0.001, \*\**p* < 0.01, NS (non-significant) *p* > 0.1 (*n* = 26–48 per experiment).

(E) Immunoblot analysis on total protein extract of transformed 2c and 6c cells showing that both clones express *TTC12a*-GFP. Abbreviations are as follows: EV, empty vector; and KD, knockdown.

DNAH9, DNAH11, and DNAI1 for ODAs; DNAH2 and DNAH10 for IDA-I1; RSPH1, RSPH3, RSPH4a, RSPH9, and RSPH11 for RSs; GAS8 for the N-DRC; and CCDC39 and CCDC40 for the ciliary ruler) indicating that all other axonemal complexes were normally assembled (Figure S12). To further study the impact of *TTC2* invalidation on ciliary axonemal components, we

analyzed cross-sections of cilia from *TTC12*-invalidated epithelial cells by TEM. As shown in Figure 7C, those cilia displayed an abnormal ultrastructure; 84% of cilia lacked IDAs, whereas a non-infected culture harbored only 3% of abnormal cilia. Again, this ultrastructural phenotype correlates with the one found in individuals with *TTC12* mutations.

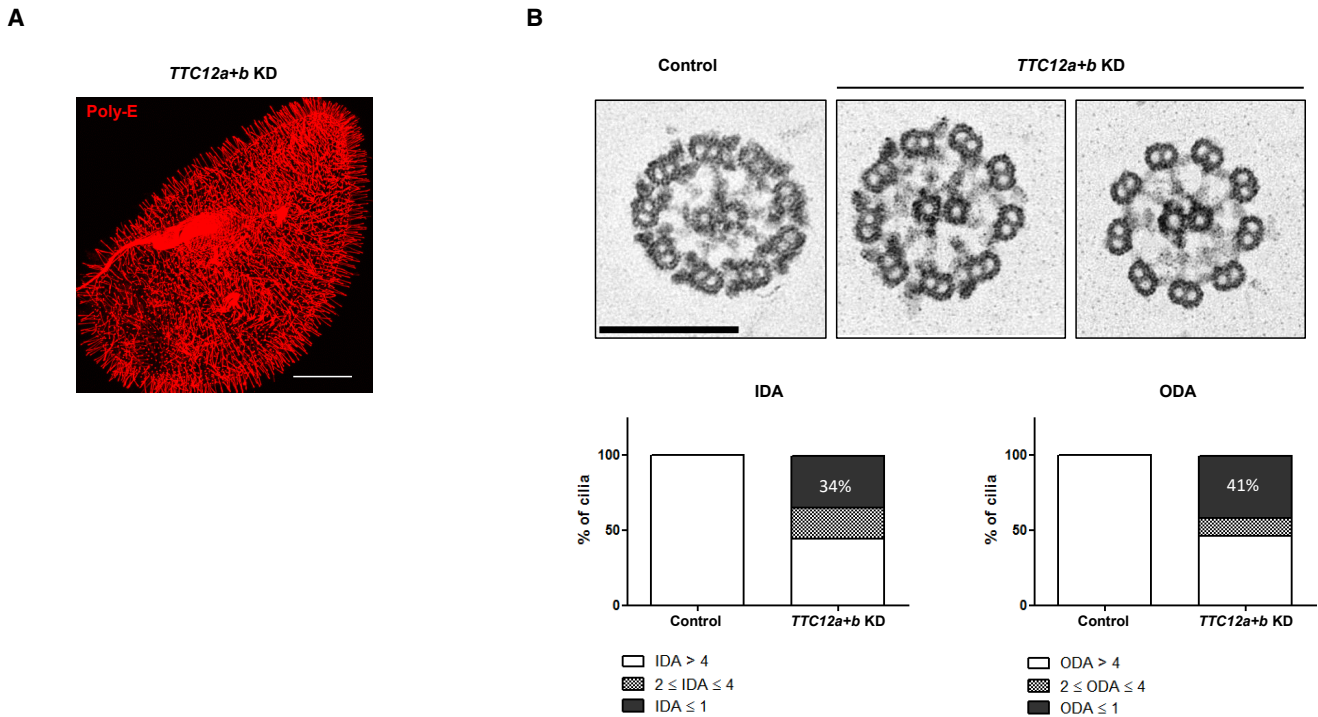

**Figure 6. Knockdown of *TTC12a+b* in *Paramecia* Leads to the Loss of Both ODAs and IDAs**

(A) Depletion of *TTC12a+b* in *Paramecium* does not affect cilia number or length. *TTC12a+b*-silenced *paramecia* were fixed and immunostained for cilia (anti-polyglutamylated tubulin antibodies) after 48 h of RNAi. The scale bar represents 20  $\mu$ m.

(B) Upper panel: Electronmicrographs of cross-sections of cilia from *TTC12a+b* KD *paramecia*. Control cilia show the normal distribution of both ODAs and IDAs. By contrast, *TTC12a+b* KD cilia show a partial or total lack of ODAs and IDAs. The scale bar represents 200 nm. Lower panel: quantitative TEM analysis of the number of IDAs and ODAs on 140 cross-sections from a control and *TTC12a+b* co-depleted cells. ODAs and IDAs were normally distributed in 100% of cilia from control cells and in about 50% of the co-depleted *TTC12a+b* cells. One must interpret this result while taking into account that, in *paramecia*, half of cilia are renewed at each cell division. Therefore, after the first division, *paramecia* display half of normal cilia and half of *TTC12a+b*-silenced cilia. The former half (generated before silencing) did not display the phenotype, whereas the new one did (generated after silencing).

Abbreviations are as follows: ODA, outer dynein arm; IDA, inner dynein arm; and KD, knockdown.

## Discussion

We report mutations in *TTC12*, a gene encoding a protein involved in the cytoplasmic assembly and/or transport of axonemal DAs, in PCD-affected individuals. A thorough analysis of the phenotype of sperm flagella and respiratory cilia from *TTC12*-deficient individuals revealed that the loss of function of *TTC12* affects both ODAs and a subset of single-headed IDAs in sperm flagella, but only a different subset of single-headed IDAs in respiratory cilia. These data, which are further supported by two cellular models of the pathology (i.e., the ciliate *Paramecium tetraurelia* depleted in *TTC12* and human AECs differentiated *in vitro* after a CRISPR-Cas9-mediated invalidation of *TTC12*), reveal the existence of distinct dynein assembly mechanisms in human sperm flagella and respiratory cilia.

The biological function of *TTC12* is still elusive. One study showed an upregulation of *TTC12* transcripts during mouse ciliogenesis *in vitro* and a centrosomal localization of *TTC12* fused to GFP.<sup>45</sup> In *paramecia*, *TTC12a*, the ortholog of human *TTC12*, was also found to be overexpressed during ciliogenesis (*ParameciumDB*). Although some *TTC* proteins have been involved in the so-called intraflagellar

transport (IFT)<sup>46–48</sup> the following points support *TTC12*'s possible role as a co-chaperone: (1) *TTC12* contains three TPR domains, three ARM domains, and two structural motifs with alpha helices known to be involved in protein-protein interactions, and TPR-containing proteins are part of several multiprotein complexes that include co-chaperones;<sup>34</sup> and (2) notably, in humans, only two other proteins, *UNC45A* and *UNC45B*, are known to contain both TPR and ARM domains, and these have been shown to interact with HSP90 and to act as molecular co-chaperones.<sup>35,49–51</sup> These data, together with the cytoplasmic localization of *TTC12*, are therefore consistent with a role of *TTC12* as a co-chaperone involved in dynein assembly.

The cytoplasmic assembly of DAs is a complex process involving a wide and still incompletely resolved chaperone-mediated protein network. DA components are first synthesized and pre-assembled into multi-subunit structures in the cytoplasm before being transported by IFT into the axoneme for microtubule attachment.<sup>52,53</sup> Except for HSP90, all the proteins known to be involved in the axonemal dynein pre-assembly network have been implicated in PCD (i.e., such proteins include CFAP300, CFAP298, CCDC103, DNAAF1, DNAAF2,

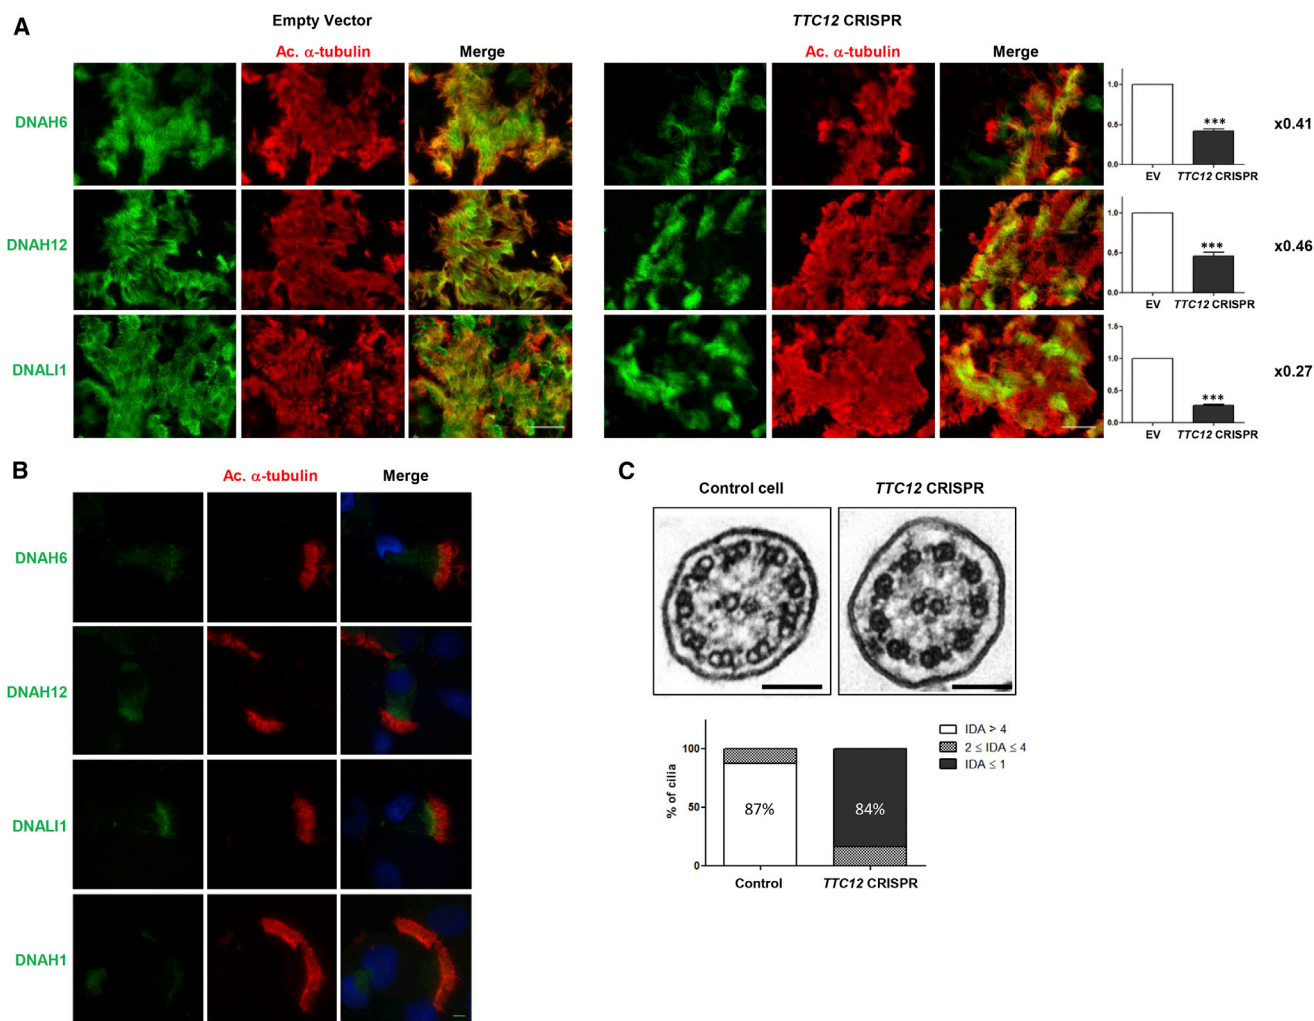

**Figure 7. TTC12 Is Required for the Assembly of Single-Headed IDAs**

(A) *TTC12* was invalidated in AEC cultures with *TTC12* CRISPR-Cas9 lentiviruses and immunostained with an anti-acetylated  $\alpha$ -tubulin antibody (red), a marker of ciliary axonemes, and anti-DNAH6, anti-DNAH12, or anti-DNALI1 antibodies as markers of single-headed IDAs (green). IF analysis in clusters of ciliated cells shows the partial inactivation of *TTC12* in culture with a loss of DNAH6, DNAH12, and DNALI1 in cells lacking *TTC12*. Scale bars represent 25  $\mu$ m. DNAH6-, DNAH12-, and DNALI1-labeled areas were measured with ImageJ software and normalized against tubulin-labeled area. The dynein/tubulin ratios obtained in *TTC12*-CRISPR-transduced cells were then normalized to ratios obtained in EV-transduced cells. Values of those final ratios are indicated on the right of the histograms and showed the decrease of dynein-chain-labeling signal compared to tubulin. Data are represented as the mean  $\pm$  SEM. Statistical analyses were performed with GraphPad Prism v5 software and two-tailed unpaired t tests. \*\*\* $p < 0.001$  ( $n = 3$ ).

(B) IF images of isolated ciliated cells lacking *TTC12* show the complete loss of DNAH12 along the cilia and its accumulation in the sub-apical region of the cytoplasm, whereas DNAH6 and DNALI1 expression appears to be strongly decreased but still present at the base of cilia. Nuclear staining was performed with DAPI (blue). The scale bar represents 25  $\mu$ m.

(C) Electromicrographs of cross-sections of cilia axonemes from a non-infected AEC culture and a *TTC12*-CRISPR-infected cell culture show an abnormal arrangement lacking IDAs in the *TTC12*-invalidated culture. Proportions of cilia harboring more than four IDAs, between two and four IDAs, and up to one IDA, in electromicrograph cross-sections, were reported in a histogram comparing control cells to *TTC12*-invalidated cells. Scale bars represent 5  $\mu$ m.

Abbreviations are as follows: ODA, outer dynein arm; IDA, inner dynein arm; and EV, empty vector.

DNAAF3, DNAAF4, DNAAF5, LRRC6, PIH1D3, SPAG1, and ZMYND10). HSP90 is known to interact with TPR domains of various co-chaperones to promote their function.<sup>54</sup> Two so-called dynein-assembly factors contain TPR domains: DNAAF4 and SPAG1. In recent studies, DNAAF4 was found to interact with both HSP90 and DNAAF2 through its TPR domains to form an R2TP-like complex.<sup>55,56</sup> PIH1D3, whose corresponding gene has recently been found to be involved in PCD, might also interact with HSP90 through

a TPR-containing protein, which could be DNAAF4.<sup>55,56</sup> Interestingly, DNAAF4, which seems to play a central role in this network, was found to interact with ZMYND10, a partner of LRRC6 and CFAP298,<sup>16,57</sup> the latter of which also interacts with DNAAF1.<sup>58</sup> In this assembly network, it has been reported that DNAAF2 and PIH1D3 interact with DNAI2,<sup>9,56</sup> a dynein intermediate chain known to assemble early in the human ODA assembly process.<sup>59</sup> As for DNAAF5, it has been shown to interact with DNAI2

but would not bind HSP90.<sup>59</sup> The functions of CFAP300, DNAAF3, SPAG1, and CCDC103 remain unclear, and there are currently no reported interactions of these proteins with HSP90 or other chaperones. In this context, TTC12, with its three TPR domains that suggest an interaction with HSP90 and/or other chaperones, emerges as a player in this complex pre-assembly network.

In most studies, the absence of both DAs in PCD-affected individuals has been identified by TEM and high-resolution IF mainly through the use of DNAH5 and DNALI1 antibodies directed, respectively, against the ODA  $\gamma$ -heavy chain and the IDA subspecies a, c, and d. However, these two approaches do not allow determination of which ODA type(s) and which IDA subspecies are affected. For DNAAF4, DNAAF5, and CCDC103 mutations, which are responsible for an absence of both DAs, the proximal staining of DNAH5 and DNAI2 and/or the loss of DNAH9 staining suggests that only type 2 ODAs are affected.<sup>9,12,15</sup>

In order to accurately decipher the role played by TTC12 in DA assembly, we aimed to identify which single-headed IDA subspecies are affected in the respiratory cilia of individuals with *TTC12* mutations. Besides the presence of ODAs, as attested to by TEM and IF analyses, IDA staining revealed that IDA-I1 remained present, whereas according to the *Chlamydomonas* model, four of the six single-headed IDA subspecies (a, c, d, and g) were affected. No conclusion could be raised on the b and e subspecies because the heavy chain DNAH12 is not yet assigned to a specific subspecies (a, b, c, or e), and no efficient antibodies are available to detect the two remaining IDA heavy chains (i.e., DNAH7 and DNAH14) (Figure 8). Of note, proteomic analyses performed on human airway cilia and spermatozoa showed that DNAH7 is present in both proteomes; in contrast, DNAH14 is undetected in both of them.<sup>36,60–62</sup> Like in cilia, spermatozoa from individuals with *TTC12* mutations conserve the dimeric IDA-I1. Nonetheless, unlike in cilia, those spermatozoa displayed an absence of ODAs, as revealed by TEM analyses and confirmed by the absence of staining of the ODA HCs (DNAH8 and DNAH17) that are specifically expressed in flagella.<sup>3</sup> Interestingly, as for single-headed IDA components, our results showed that the IDA heavy chain DNAH3 (present in the IDA subspecies a, b, c, or e) is detected in flagellar axonemes but is not detectable in cilia; these results are in line with what would be expected from proteomic data.<sup>36,60</sup> Additionally, spermatozoa from an individual with bi-allelic *TTC12* mutations displayed a loss of DNAH3 as well as a mislocalization of DNAH12 (another monomeric IDA heavy chain that is not specifically assigned to subspecies a, b, c, or e), thereby unveiling the role of TTC12 in the proper expression of DNAH3 and DNAH12 in sperm cells.

Surprisingly, although DNAH1 (d) and DNAH6 (g) are present in both normal cilia and flagella, they were not impacted by *TTC12* mutations in spermatozoa, in contrast with what was observed in cilia.

Moreover, in those spermatozoa, DNALI1 amounts were found to be reduced but present (Figure 8).

Taken together, these results show that, in spermatozoa, *TTC12* defects lead to the complete absence of ODAs and of a set of monomeric IDA subspecies; this set is different from the set of monomeric IDA subspecies impacted in respiratory cilia. Although the absence of ODAs in flagella could be explained by differences in ODA composition between cilia and flagella (DNAH5, DNAH9, and DNAH11 in cilia; DNAH8 and DNAH17 in flagella), the differences affecting single-headed IDAs are not exclusively due to distinct dynein HC composition (e.g., DNAH1 and DNAH6 are both present in cilia and flagella).

In paramecia, *TTC12* knock down led both to the absence of DAs and to a drastic impairment of the swimming velocity. This suggests similarities in the ODA and IDA assembly process at play in this protist and in human sperm flagella. In human cilia, the defects of all known co-chaperones, except for *TTC12*, affect both ODAs and IDAs. The situation is very different in *Chlamydomonas*, where several of the algal homolog genes are important for assembly of one DA type; *DNAAF1* and *HEATR2* homologs (i.e., *ODA7* and *HEATR2*, respectively) govern the assembly of ODAs only, whereas the *DNAAF4* homolog (i.e., *PF23*) contributes only to the assembly of some IDAs.<sup>63</sup>

Because paramecia mimicked the human flagellar phenotype but not the ciliary one, we looked for an additional cellular model to further strengthen our conclusions on the role of *TTC12* in cilia. We developed a human differentiated cell-culture model based on CRISPR-Cas9 invalidation of *TTC12*. Primary AECs cultured under ALI conditions constitute a strong epithelial barrier that is very difficult to efficiently transfect, especially without inhibiting ciliogenesis. In this study, we showed that transduction of AECs during their expansion phase not only is highly efficient but, most importantly, also preserves ciliogenesis and thus provides large amounts of ciliated cells from which DNA, RNA, and protein expression can be studied. After puromycin selection, 100% of cultured cells were infected, but four populations with different genotypes could have been present: no indel in *TTC12*, indels within one *TTC12* allele, distinct indels within each of the two *TTC12* alleles, or the same indel within the two *TTC12* alleles; these genotypes are equivalent to a wild-type genotype at the *TTC12* locus and to a *TTC12* loss-of-function mutation present in the heterozygous, compound heterozygous, and homozygous state, respectively. Because AECs cannot be dissociated and isolated for selection, contrary to what is done for cell lines, we had to work with a heterogeneous population of cells that were either invalidated or not invalidated for *TTC12*. Nevertheless, our results revealed that *TTC12* CRISPR AECs perfectly mimic the phenotype observed in cilia from individuals carrying *TTC12* mutations, whereas *TTC12*-KD paramecia displayed a ciliary phenotype closer to the flagellar phenotype observed in human spermatozoa. From a general viewpoint, this demonstrates that CRISPR-Cas9-engineered AECs represent a valuable model

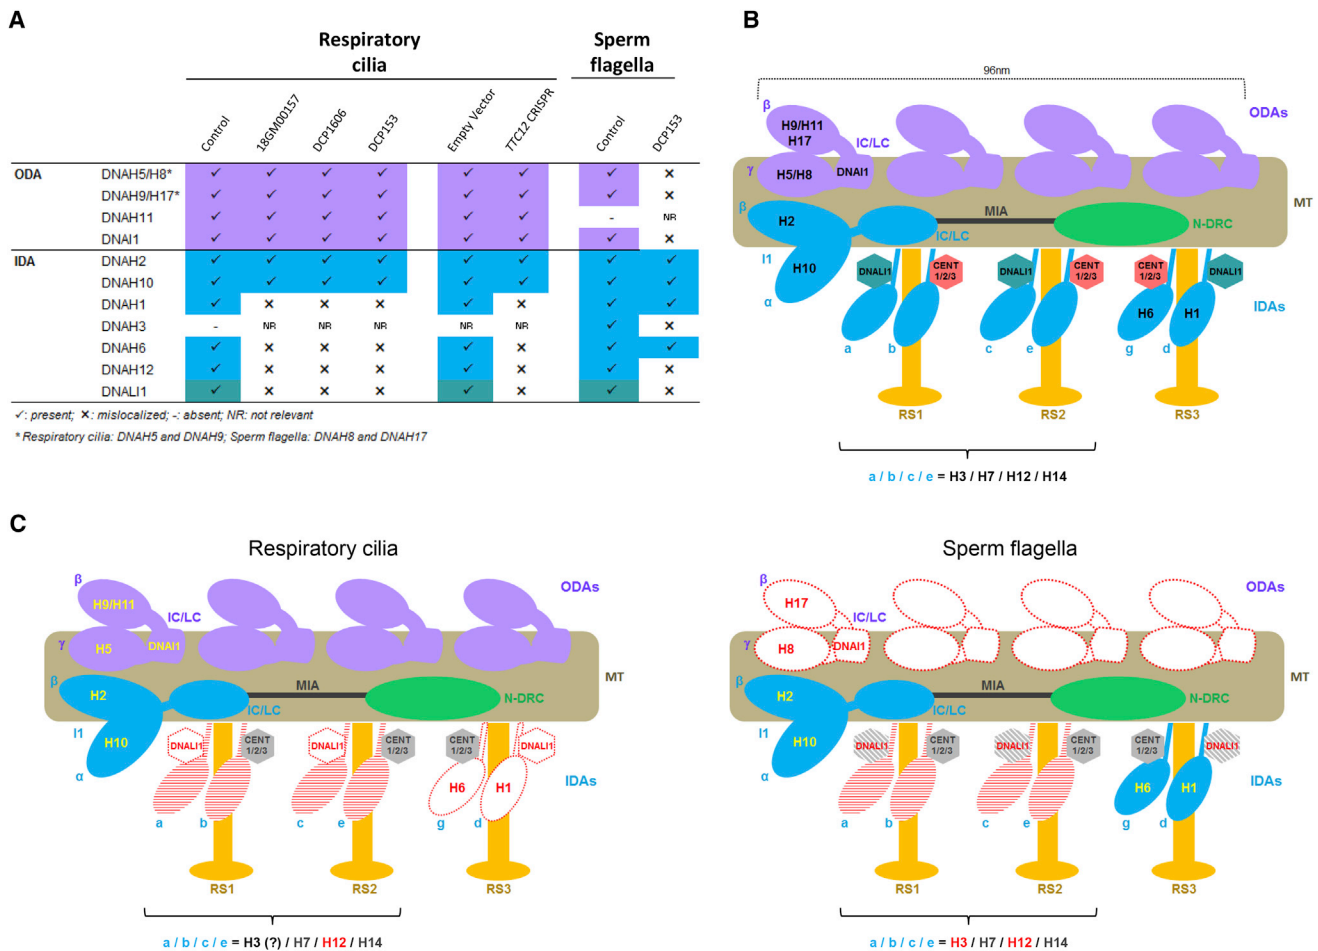

**Figure 8. Dynein Chains Affected by the Absence of TTC12 and Diagrammatic Representation of the Axonemal Components Impacted by TTC12 Loss-of-Function Mutations in Respiratory Cilia and Sperm Flagella**

(A) Table summarizing the dynein chains studied by IF in AECs of a control and of individuals 18GM00157, DCP1606, DCP153, in AEC cultures invalidated or not for *TTC12* by a CRISPR-Cas9 approach, and in spermatozoa from a control and from individual DCP153. ODA labeling was performed with anti-DNAH5 and anti-DNAH9 antibodies in AECs and anti-DNAH8 and anti-DNAH17 antibodies in spermatozoa. Black check marks represent normal localization, minus signs represent an absence of protein, and black cross signs indicate mislocalization. NR: not relevant.

(B) Schematic structure of a normal 96-nm-long axonemal unit. Each unit, which repeats along the microtubule doublets, consists of four ODAs represented in purple and IDAs shown in blue. Because the exact composition of IDAs is virtually unknown in humans, the IDA representation is based on data from *Chlamydomonas*, in which the seven IDA subspecies include six single-headed DAs (a, b, c, e, g, and d) and one double-headed DA (IDA-I1).

(C) Phenotype of *TTC12*-deficient respiratory cilia versus *TTC12*-deficient sperm flagella. The proteins unaffected by the loss of *TTC12* are represented in full color and written in yellow, and the proteins affected by the loss of *TTC12* are represented in white with a red dotted line and written in red. The proteins found to be affected by *TTC12* mutations, but for which the exact localization is unknown in humans, are represented in a hatched red pattern and are written in red. Proteins with lower but non-null expression are represented in a hatched gray pattern and are written in red. The proteins that could not be tested are represented and written in gray.

Abbreviations are as follows: ODA, outer dynein arm; IDA, inner dynein arm; N-DRC, nexin-dynein regulatory complex; MIA, modifier of inner arms; IC/LC, intermediate chain/light chain; RS, radial spoke; and MT, microtubules.

for studying the impact of PCD mutations on ciliary axonemes.

As for clinical aspects, the diagnosis of PCD is difficult to establish in individuals with mild respiratory symptoms and no laterality defect. In such situations, low concentrations of nasal NO, an abnormal ciliary beat frequency, and/or the presence of ciliary ultrastructural defects is essential if clinicians are to confirm or deny the suspicion of PCD. In the current study, all the individuals were exempt from laterality defects and displayed motile cilia with a normal beat frequency. In two of the individuals,

nasal NO concentrations were normal. Furthermore, the ciliary ultrastructural defect (i.e., the isolated absence of IDAs with an inconstant and mild axonemal disorganization) was also difficult to assert by TEM because of the usual low contrast of IDAs. The diagnosis of PCD was, however, much easier to establish in the two adult male individuals because of their infertility due to a sperm immotility related to the flagellar absence of both DAs, an ultrastructural defect easily identified by TEM. It is therefore tempting to speculate that PCD could be underdiagnosed in female individuals with *TTC12* mutations, in young male individuals,

or in adult males for whom no TEM analyses of their spermatozoa is performed, thereby underscoring the major benefit of molecular analyses in such individuals.

In conclusion, *TTC12* emerges as a cytoplasmic player in DA assembly and/or transport. So far, all the mutations in genes encoding cytoplasmic pre-assembly factors cause a combined ODA and IDA defect. However, *TTC12* mutations lead to distinct ultrastructural defects in cilia (i.e., absence of single-headed IDAs) and in sperm flagella (i.e., absence of both DAs), which unveils its role as a possible co-chaperone in charge of monomeric IDAs in both organelles but not of ODAs in cilia. More precisely, *TTC12* is in charge of different dynein heavy chains in monomeric IDAs from cilia and from flagella. Furthermore, our findings should be of particular help to establish the diagnosis of PCD in individuals with isolated IDA defects in respiratory cilia. The development of a cellular model based on human AECs differentiated *in vitro* into ciliated cells after a CRISPR-cas9-mediated invalidation of genes of interest should open new avenues to decipher both the role of the numerous proteins expressed during ciliogenesis and the pathophysiology of diseases of the airway epithelium.

### Supplemental Data

Supplemental Data can be found online at <https://doi.org/10.1016/j.ajhg.2019.12.010>.

### Acknowledgments

We are grateful to the affected persons and their families, whose cooperation made this study possible. We acknowledge the contributions of the CELPHEDIA Infrastructure, especially the center AniRA in Lyon and Gisèle Froment, Didier Nègre, and Caroline Costa from the lentivectors production facility (UMS3444/US8, SFR Biosciences Gerland-Lyon Sud) and RaDiCo, funded by the French National Research Agency under the specific program “Investments for the Future,” (Cohort grant agreement ANR-10-COHO-0003) and the Chancellerie des Universités de Paris (Legs Poix grant). We thank Lucas Fares-Taie and Araksya Izmiryan at IMAGINE Institute for their advice in setting up the CRISPR-Cas9 technology. We thank Anne Loyens from INSERM U1172 at Lille University for TEM technical assistance and Feng Zhang from the Massachusetts Institute of Technology for the gift of the plentiCRISPRv2 plasmid.

### Declaration of Interests

The authors declare no competing interests.

Received: October 11, 2019

Accepted: December 18, 2019

Published: January 23, 2020

### Web Resources

CELPHEDIA Infrastructure, <http://www.celphedia.eu/>  
Conserved Domain Database (NCBI CDD webtool), <https://www.ncbi.nlm.nih.gov/cdd/>

Clustal Omega program, <https://www.ebi.ac.uk/Tools/msa/clustalo/>  
CRISPOR TEFOR, <http://crispor.tefor.net/>  
EMBL EBI Ensembl, <https://www.ensembl.org/index.html>  
EMBL EBI Expression Atlas, <https://www.ebi.ac.uk/gxa/home>  
GnomAD, <https://gnomad.broadinstitute.org/>  
InterPro, <https://www.ebi.ac.uk/interpro/>  
OMIM, <https://www.omim.org/>  
ParameciumDB, <https://paramecium.i2bc.paris-saclay.fr>  
SMART, <http://smart.embl-heidelberg.de/>  
TIDE, <https://tide.deskgen.com/>  
Uniprot, <https://www.uniprot.org/>

### References

1. Lucas, J.S., Burgess, A., Mitchison, H.M., Moya, E., Williamson, M., Hogg, C., National, P.C.D.; and National PCD Service, UK (2014). Diagnosis and management of primary ciliary dyskinesia. *Arch. Dis. Child.* *99*, 850–856.
2. Dasgupta, A., and Amack, J.D. (2016). Cilia in vertebrate left-right patterning. *Philos. Trans. R. Soc. Lond. B Biol. Sci.* *371*, 20150410.
3. Whitfield, M., Thomas, L., Bequignon, E., Schmitt, A., Stouvenel, L., Montantin, G., Tissier, S., Duquesnoy, P., Copin, B., Chantot, S., et al. (2019). Mutations in DNAH17, encoding a sperm-specific axonemal outer dynein arm heavy chain, cause isolated male infertility due to Asthenozoospermia. *Am. J. Hum. Genet.* *105*, 198–212.
4. Bui, K.H., Yagi, T., Yamamoto, R., Kamiya, R., and Ishikawa, T. (2012). Polarity and asymmetry in the arrangement of dynein and related structures in the *Chlamydomonas* axoneme. *J. Cell Biol.* *198*, 913–925.
5. Lin, J., Yin, W., Smith, M.C., Song, K., Leigh, M.W., Zariwala, M.A., Knowles, M.R., Ostrowski, L.E., and Nicastro, D. (2014). Cryo-electron tomography reveals ciliary defects underlying human RSPH1 primary ciliary dyskinesia. *Nat. Commun.* *5*, 5727.
6. Viswanadha, R., Sale, W.S., and Porter, M.E. (2017). Ciliary motility: Regulation of axonemal dynein motors. *Cold Spring Harb. Perspect. Biol.* *9*, a018325.
7. Hom, E.F.Y., Witman, G.B., Harris, E.H., Dutcher, S.K., Kamiya, R., Mitchell, D.R., Pazour, G.J., Porter, M.E., Sale, W.S., Wirschell, M., et al. (2011). A unified taxonomy for ciliary dyneins. *Cytoskeleton (Hoboken)* *68*, 555–565.
8. Lucas, J.S., Barbato, A., Collins, S.A., Goutaki, M., Behan, L., Caudri, D., Dell, S., Eber, E., Escudier, E., Hirst, R.A., et al. (2017). European Respiratory Society guidelines for the diagnosis of primary ciliary dyskinesia. *Eur. Respir. J.* *49*, 1601090.
9. Omran, H., Kobayashi, D., Olbrich, H., Tsukahara, T., Loges, N.T., Hagiwara, H., Zhang, Q., Leblond, G., O’Toole, E., Hara, C., et al. (2008). Ktu/PF13 is required for cytoplasmic pre-assembly of axonemal dyneins. *Nature* *456*, 611–616.
10. Duquesnoy, P., Escudier, E., Vincensini, L., Freshour, J., Bridoux, A.-M., Coste, A., Deschildre, A., de Blic, J., Legendre, M., Montantin, G., et al. (2009). Loss-of-function mutations in the human ortholog of *Chlamydomonas reinhardtii* ODA7 disrupt dynein arm assembly and cause primary ciliary dyskinesia. *Am. J. Hum. Genet.* *85*, 890–896.
11. Mitchison, H.M., Schmidts, M., Loges, N.T., Freshour, J., Dritsoula, A., Hirst, R.A., O’Callaghan, C., Blau, H., Al Dabbagh, M., Olbrich, H., et al. (2012). Mutations in axonemal dynein assembly factor DNAAF3 cause primary ciliary dyskinesia. *Nat. Genet.* *44*, 381–389, S1–S2.

12. Panizzi, J.R., Becker-Heck, A., Castleman, V.H., Al-Mutairi, D.A., Liu, Y., Loges, N.T., Pathak, N., Austin-Tse, C., Sheridan, E., Schmidts, M., et al. (2012). CCDC103 mutations cause primary ciliary dyskinesia by disrupting assembly of ciliary dynein arms. *Nat. Genet.* *44*, 714–719.
13. Horani, A., Druley, T.E., Zariwala, M.A., Patel, A.C., Levinson, B.T., Van Arendonk, L.G., Thornton, K.C., Giacalone, J.C., Albee, A.J., Wilson, K.S., et al. (2012). Whole-exome capture and sequencing identifies HEATR2 mutation as a cause of primary ciliary dyskinesia. *Am. J. Hum. Genet.* *91*, 685–693.
14. Kott, E., Duquesnoy, P., Copin, B., Legendre, M., Dastot-Le Moal, F., Montantin, G., Jeanson, L., Tamalet, A., Papon, J.-F., Siffroi, J.-P., et al. (2012). Loss-of-function mutations in LRRC6, a gene essential for proper axonemal assembly of inner and outer dynein arms, cause primary ciliary dyskinesia. *Am. J. Hum. Genet.* *91*, 958–964.
15. Tarkar, A., Loges, N.T., Slagle, C.E., Francis, R., Dougherty, G.W., Tamayo, J.V., Shook, B., Cantino, M., Schwartz, D., Jahnke, C., et al.; UK10K (2013). DYX1C1 is required for axonemal dynein assembly and ciliary motility. *Nat. Genet.* *45*, 995–1003.
16. Zariwala, M.A., Gee, H.Y., Kurkowiak, M., Al-Mutairi, D.A., Leigh, M.W., Hurd, T.W., Hjeij, R., Dell, S.D., Chaki, M., Dougherty, G.W., et al. (2013). ZMYND10 is mutated in primary ciliary dyskinesia and interacts with LRRC6. *Am. J. Hum. Genet.* *93*, 336–345.
17. Knowles, M.R., Ostrowski, L.E., Loges, N.T., Hurd, T., Leigh, M.W., Huang, L., Wolf, W.E., Carson, J.L., Hazucha, M.J., Yin, W., et al. (2013). Mutations in SPAG1 cause primary ciliary dyskinesia associated with defective outer and inner dynein arms. *Am. J. Hum. Genet.* *93*, 711–720.
18. Austin-Tse, C., Halbritter, J., Zariwala, M.A., Gilberti, R.M., Gee, H.Y., Hellman, N., Pathak, N., Liu, Y., Panizzi, J.R., Patel-King, R.S., et al. (2013). Zebrafish ciliopathy screen plus human mutational analysis identifies C21orf59 and CCDC65 defects as causing primary ciliary dyskinesia. *Am. J. Hum. Genet.* *93*, 672–686.
19. Paff, T., Loges, N.T., Aprea, I., Wu, K., Bakey, Z., Haarman, E.G., Daniels, J.M.A., Sistermans, E.A., Bogunovic, N., Dougherty, G.W., et al. (2017). Mutations in PIH1D3 cause X-Linked primary ciliary dyskinesia with outer and inner dynein arm defects. *Am. J. Hum. Genet.* *100*, 160–168.
20. Höben, I.M., Hjeij, R., Olbrich, H., Dougherty, G.W., Nöthe-Menchen, T., Aprea, I., Frank, D., Pennekamp, P., Dworniczak, B., Wallmeier, J., et al. (2018). Mutations in C11orf70 cause primary ciliary dyskinesia with randomization of left/right body asymmetry due to defects of outer and inner dynein arms. *Am. J. Hum. Genet.* *102*, 973–984.
21. Huizar, R.L., Lee, C., Boulgakov, A.A., Horani, A., Tu, F., Marcotte, E.M., Brody, S.L., and Wallingford, J.B. (2018). A liquid-like organelle at the root of motile ciliopathy. *eLife* *7*, e38497.
22. Verra, F., Fleury-Feith, J., Boucherat, M., Pinchon, M.-C., Bignon, J., and Escudier, E. (1993). Do nasal ciliary changes reflect bronchial changes? An ultrastructural study. *Am. Rev. Respir. Dis.* *147*, 908–913.
23. Cooper, T.G., Noonan, E., von Eckardstein, S., Auger, J., Baker, H.W.G., Behre, H.M., Haugen, T.B., Kruger, T., Wang, C., Mbizvo, M.T., and Vogelsohn, K.M. (2010). World Health Organization reference values for human semen characteristics. *Hum. Reprod. Update* *16*, 231–245.
24. Skouri, F., and Cohen, J. (1997). Genetic approach to regulated exocytosis using functional complementation in *Paramecium*: identification of the ND7 gene required for membrane fusion. *Mol. Biol. Cell* *8*, 1063–1071.
25. Sonneborn, T.M. (1970). Chapter 12: Methods in *Paramecium* Research. In *Methods in Cell Biology*, D.M. Prescott, ed. (Academic Press), pp. 241–339.
26. Galvani, A., and Sperling, L. (2002). RNA interference by feeding in *Paramecium*. *Trends Genet.* *18*, 11–12.
27. Timmons, L., and Fire, A. (1998). Specific interference by ingested dsRNA. *Nature* *395*, 854.
28. Hauser, K., Haynes, W.J., Kung, C., Plattner, H., and Kissmehl, R. (2000). Expression of the green fluorescent protein in *Paramecium tetraurelia*. *Eur. J. Cell Biol.* *79*, 144–149.
29. Rüdiger, A.H., Rüdiger, M., Wehland, J., and Weber, K. (1999). Monoclonal antibody ID5: epitope characterization and minimal requirements for the recognition of polyglutamylated alpha- and beta-tubulin. *Eur. J. Cell Biol.* *78*, 15–20.
30. Adoutte, A., Ramanathan, R., Lewis, R.M., Dute, R.R., Ling, K.Y., Kung, C., and Nelson, D.L. (1980). Biochemical studies of the excitable membrane of *Paramecium tetraurelia*. III. Proteins of cilia and ciliary membranes. *J. Cell Biol.* *84*, 717–738.
31. Coste, A., Brugel, L., Maître, B., Boussat, S., Papon, J.F., Wingerstmann, L., Peynègre, R., and Escudier, E. (2000). Inflammatory cells as well as epithelial cells in nasal polyps express vascular endothelial growth factor. *Eur. Respir. J.* *15*, 367–372.
32. Horani, A., Nath, A., Wasserman, M.G., Huang, T., and Brody, S.L. (2013). Rho-associated protein kinase inhibition enhances airway epithelial Basal-cell proliferation and lentivirus transduction. *Am. J. Respir. Cell Mol. Biol.* *49*, 341–347.
33. Auger, J., Jouannet, P., and Eustache, F. (2016). Another look at human sperm morphology. *Hum. Reprod.* *31*, 10–23.
34. Blatch, G.L., and Lässle, M. (1999). The tetratricopeptide repeat: a structural motif mediating protein-protein interactions. *BioEssays* *21*, 932–939.
35. Tewari, R., Bailes, E., Bunting, K.A., and Coates, J.C. (2010). Armadillo-repeat protein functions: questions for little creatures. *Trends Cell Biol.* *20*, 470–481.
36. Blackburn, K., Bustamante-Marin, X., Yin, W., Goshe, M.B., and Ostrowski, L.E. (2017). Quantitative proteomic analysis of human airway cilia identifies previously uncharacterized proteins of high abundance. *J. Proteome Res.* *16*, 1579–1592.
37. Hjeij, R., Lindstrand, A., Francis, R., Zariwala, M.A., Liu, X., Li, Y., Damerla, R., Dougherty, G.W., Abouhamed, M., Olbrich, H., et al. (2013). ARMC4 mutations cause primary ciliary dyskinesia with randomization of left/right body asymmetry. *Am. J. Hum. Genet.* *93*, 357–367.
38. Jaganathan, K., Kyriazopoulou Panagiotopoulou, S., McRae, J.F., Darbandi, S.F., Knowles, D., Li, Y.I., Kosmicki, J.A., Arbe-laez, J., Cui, W., Schwartz, G.B., et al. (2019). Predicting splicing from primary sequence with deep learning. *Cell* *176*, 535–548.e24.
39. Osinka, A., Poprzeczko, M., Zielinska, M.M., Fabczak, H., Joachimiak, E., and Wloga, D. (2019). Ciliary proteins: Filling the gaps. recent advances in deciphering the protein composition of motile ciliary complexes. *Cells* *8*, 730.
40. Kollmar, M. (2016). Fine-tuning motile cilia and flagella: Evolution of the dynein motor proteins from plants to humans at high resolution. *Mol. Biol. Evol.* *33*, 3249–3267.
41. Fassad, M.R., Shoemark, A., Legendre, M., Hirst, R.A., Koll, F., le Borgne, P., Louis, B., Daudvohra, F., Patel, M.P., Thomas, L., et al. (2018). Mutations in outer dynein arm heavy chain



- DNAH9 cause motile cilia defects and situs inversus. *Am. J. Hum. Genet.* *103*, 984–994.
42. Fassad, M.R., Shoemark, A., le Borgne, P., Koll, F., Patel, M., Dixon, M., Hayward, J., Richardson, C., Frost, E., Jenkins, L., et al. (2018). C11orf70 mutations disrupting the intraflagellar transport-dependent assembly of multiple axonemal dyneins cause primary ciliary dyskinesia. *Am. J. Hum. Genet.* *102*, 956–972.
  43. Arnaiz, O., Malinowska, A., Klotz, C., Sperling, L., Dadlez, M., Koll, F., and Cohen, J. (2009). Cildb: a knowledgebase for centrosomes and cilia. *Database (Oxford)* *2009*, bap022.
  44. Arnaiz, O., Cohen, J., Tassin, A.M., and Koll, F. (2014). Remodeling Cildb, a popular database for cilia and links for ciliopathies. *Cilia* *3*, 9.
  45. Hoh, R.A., Stowe, T.R., Turk, E., and Stearns, T. (2012). Transcriptional program of ciliated epithelial cells reveals new cilium and centrosome components and links to human disease. *PLoS ONE* *7*, e52166.
  46. Xu, Y., Cao, J., Huang, S., Feng, D., Zhang, W., Zhu, X., and Yan, X. (2015). Characterization of tetratricopeptide repeat-containing proteins critical for cilia formation and function. *PLoS ONE* *10*, e0124378.
  47. Pazour, G.J., Dickert, B.L., Vucica, Y., Seeley, E.S., Rosenbaum, J.L., Witman, G.B., and Cole, D.G. (2000). *Chlamydomonas* *IFT88* and its mouse homologue, polycystic kidney disease gene *tg737*, are required for assembly of cilia and flagella. *J. Cell Biol.* *151*, 709–718.
  48. Taschner, M., Bhogaraju, S., and Lorentzen, E. (2012). Architecture and function of IFT complex proteins in ciliogenesis. *Differentiation* *83*, S12–S22.
  49. Eisa, N.H., Jilani, Y., Kainth, K., Redd, P., Lu, S., Bougrine, O., Abdul Sater, H., Patwardhan, C.A., Shull, A., Shi, H., et al. (2019). The co-chaperone UNC45A is essential for the expression of mitotic kinase NEK7 and tumorigenesis. *J. Biol. Chem.* *294*, 5246–5260.
  50. Mooneyham, A., Iizuka, Y., Yang, Q., Coombes, C., McClellan, M., Shridhar, V., Emmings, E., Shetty, M., Chen, L., Ai, T., et al. (2019). UNC-45A Is a Novel Microtubule-Associated Protein and Regulator of Paclitaxel Sensitivity in Ovarian Cancer Cells. *Mol. Cancer Res.* *17*, 370–383.
  51. Nicholls, P., Bujalowski, P.J., Epstein, H.F., Boehning, D.F., Baral, J.M., and Oberhauser, A.F. (2014). Chaperone-mediated reversible inhibition of the sarcomeric myosin power stroke. *FEBS Lett.* *588*, 3977–3981.
  52. Kobayashi, D., and Takeda, H. (2012). Ciliary motility: the components and cytoplasmic preassembly mechanisms of the axonemal dyneins. *Differentiation* *83*, S23–S29.
  53. Rosenbaum, J.L., and Witman, G.B. (2002). Intraflagellar transport. *Nat. Rev. Mol. Cell Biol.* *3*, 813–825.
  54. Assimon, V.A., Southworth, D.R., and Gestwicki, J.E. (2015). Specific binding of tetratricopeptide repeat proteins to heat shock protein 70 (Hsp70) and heat shock protein 90 (Hsp90) is regulated by affinity and phosphorylation. *Biochemistry* *54*, 7120–7131.
  55. Pal, M., Morgan, M., Phelps, S.E.L., Roe, S.M., Parry-Morris, S., Downs, J.A., Polier, S., Pearl, L.H., and Prodromou, C. (2014). Structural basis for phosphorylation-dependent recruitment of Tel2 to Hsp90 by Pih1. *Structure* *22*, 805–818.
  56. Olcese, C., Patel, M.P., Shoemark, A., Kiviluoto, S., Legendre, M., Williams, H.J., Vaughan, C.K., Hayward, J., Goldenberg, A., Emes, R.D., et al. (2017). X-linked primary ciliary dyskinesia due to mutations in the cytoplasmic axonemal dynein assembly factor PIH1D3. *Nat. Commun.* *8*, 14279.
  57. Cho, K.J., Noh, S.H., Han, S.M., Choi, W.-I., Kim, H.-Y., Yu, S., Lee, J.S., Rim, J.H., Lee, M.G., Hildebrandt, F., and Gee, H.Y. (2018). ZMYND10 stabilizes intermediate chain proteins in the cytoplasmic pre-assembly of dynein arms. *PLoS Genet.* *14*, e1007316.
  58. Jaffe, K.M., Grimes, D.T., Schottenfeld-Roames, J., Werner, M.E., Ku, T.S., Kim, S.K., Pelliccia, J.L., Morante, N.F.C., Mitchell, B.J., and Burdine, R.D. (2016). c21orf59/kurly controls both cilia motility and polarization. *Cell Rep.* *14*, 1841–1849.
  59. Diggie, C.P., Moore, D.J., Mali, G., zur Lage, P., Ait-Lounis, A., Schmidts, M., Shoemark, A., Garcia Munoz, A., Halachev, M.R., Gautier, P., et al. (2014). HEATR2 plays a conserved role in assembly of the ciliary motile apparatus. *PLoS Genet.* *10*, e1004577.
  60. Wang, G., Guo, Y., Zhou, T., Shi, X., Yu, J., Yang, Y., Wu, Y., Wang, J., Liu, M., Chen, X., et al. (2013). In-depth proteomic analysis of the human sperm reveals complex protein compositions. *J. Proteomics* *79*, 114–122.
  61. Amaral, A., Castillo, J., Estanyol, J.M., Ballescà, J.L., Ramalho-Santos, J., and Oliva, R. (2013). Human sperm tail proteome suggests new endogenous metabolic pathways. *Mol. Cell. Proteomics* *12*, 330–342.
  62. Vandenbrouck, Y., Lane, L., Carapito, C., Duek, P., Rondel, K., Bruley, C., Macron, C., Gonzalez de Peredo, A., Couté, Y., Chaoui, K., et al. (2016). Looking for missing proteins in the proteome of human spermatozoa: An update. *J. Proteome Res.* *15*, 3998–4019.
  63. Desai, P.B., Dean, A.B., and Mitchell, D.R. (2018). Chapter 4: Cytoplasmic preassembly and trafficking of axonemal dyneins. In *Dyneins*, Second Edition, S.M. King, ed. (Academic Press), pp. 140–161.

## Supplemental Data

### ***TTC12* Loss-of-Function Mutations Cause Primary Ciliary**

### **Dyskinesia and Unveil Distinct Dynein Assembly**

### **Mechanisms in Motile Cilia Versus Flagella**

Lucie Thomas, Khaled Bouhouche, Marjorie Whitfield, Guillaume Thouvenin, Andre Coste, Bruno Louis, Claire Szymanski, Emilie Bequignon, Jean-François Papon, Manon Castelli, Michel Lemullois, Xavier Dhalluin, Valérie Drouin-Garraud, Guy Montantin, Sylvie Tissier, Philippe Duquesnoy, Bruno Copin, Florence Dastot, Sandrine Couvet, Anne-Laure Barbotin, Catherine Faucon, Isabelle Honore, Bernard Maitre, Nicole Beydon, Aline Tamalet, Nathalie Rives, France Koll, Estelle Escudier, Anne-Marie Tassin, Aminata Touré, Valérie Mitchell, Serge Amselem, and Marie Legendre

**A**

```

TTC12a_WT          GAGCACTTTTACGCATAAGAAATGGGAATATTATACAAGTTCAGAAGAAGAAATTGAATC 60
TTC12a_RNAi_resistant GAGCACGTTTACTCATAAAAAATGGGAATACTATACATCATCAGAAGAGGAAATCGAATC 60
*****  *****  *****  *****  *****  *****  *****  *****  *****

TTC12a_WT          TGAGCCAATAGTTCCTAAAGATGACCCAAATTTTCAGAGCCTTAGAATTAGATATGGAATA 120
TTC12a_RNAi_resistant AGAGCCTATTGTCCAAAAGACGATCCTAACTTTAGAGCTTTGGAATTGGATATGGAGCA 120
*****  *  *****  *****  *  *  *  *  *  *  *  *  *  *  *  *  *  *  *  *

TTC12a_WT          AAGAAAGAAAAAGAAAGAGGAAGACATGAAAAAGGCAGAGGAATTGAAAAACAAAGGCAA 180
TTC12a_RNAi_resistant AAGAAAAAGAAAAAGGAAGAGGATATGAAGAAAGCTGAAGAGTTAAAGAATAAGGGCAA 180
*****  *  *  *  *  *  *  *  *  *  *  *  *  *  *  *  *  *  *  *  *  *  *

TTC12a_WT          TGAGTATTATAGTAAGGGTGATTATGATCATGCGGCTTGGAATATTCTTAAGCCCTTGA 240
TTC12a_RNAi_resistant CGAATATTACTCAAAGGAGATTATGATCAGCTGCGTGGAAGTATTTCATAAGCTTTGGA 240
*  *  *****  *  *  *  *  *  *  *  *  *  *  *  *  *  *  *  *  *  *  *

TTC12a_WT          ATTAGTAAAGGATAATAAGACTTTGTGGTTAAATC          275
TTC12a_RNAi_resistant ATTGGTTAAAGATAACAAGACATTATGGTTGAACC          275
*  *  *  *  *  *  *  *  *  *  *  *  *  *  *  *  *  *  *  *  *  *

```

212/275 (77.09%)

**B**

```

TTC12a_WT          STFTHKKWEYYTSSEEEIESEPIVPKDDPNFRALELDMEQRKKKKEEDMKKAEELKNKGN 60
TTC12a_RNAi_resistant STFTHKKWEYYTSSEEEIESEPIVPKDDPNFRALELDMEQRKKKKEEDMKKAEELKNKGN 60
*****

TTC12a_WT          EYYSKGDYDHAAWKYSQALELVKDNKTLWLN 91
TTC12a_RNAi_resistant EYYSKGDYDHAAWKYSQALELVKDNKTLWLN 91
*****

```

91/91 (100%)

**Figure S1. *P. tetraurelia* nucleic acid and protein sequences of TTC12a versus TTC12a RNAi-resistant**

DNA (A) and protein (B) alignments from ClustalOmega of the target of RNAi (275pb) for WT TTC12a and RNAi-resistant TTC12a. Fully conserved residue (\*).

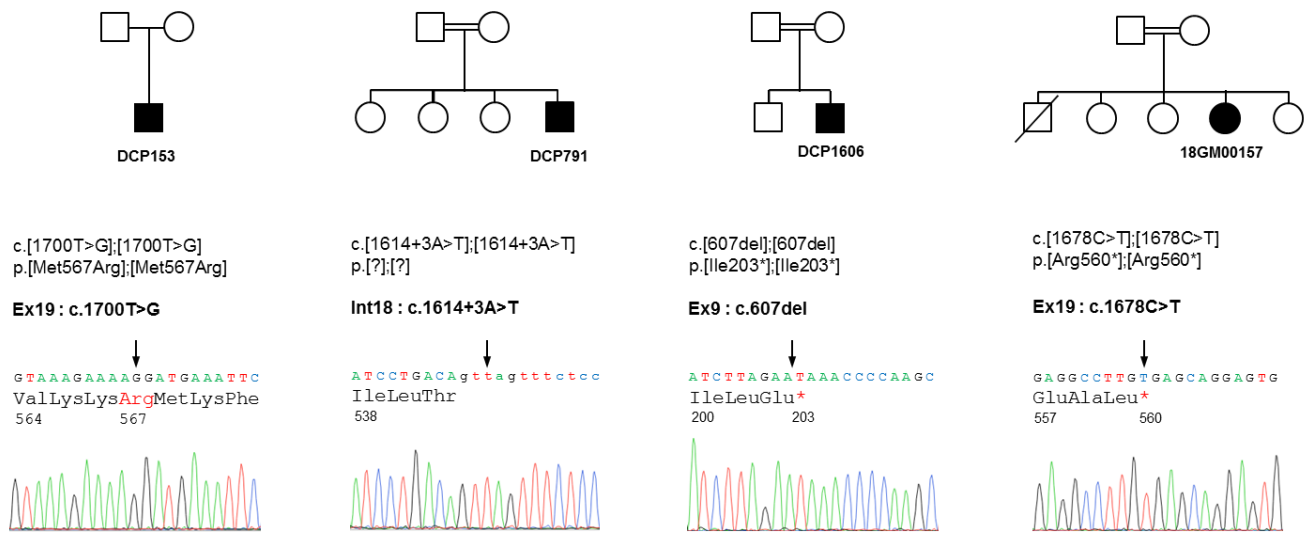

**Figure S2. *TTC12* mutations identified in the four independent families**

Top: Genealogical trees. Full symbols indicate primary ciliary dyskinesia. All but one individual (DCP153) were born to known consanguineous unions. Bottom: Electrophoregrams showing the *TTC12* mutations identified in the four unrelated PCD probands.

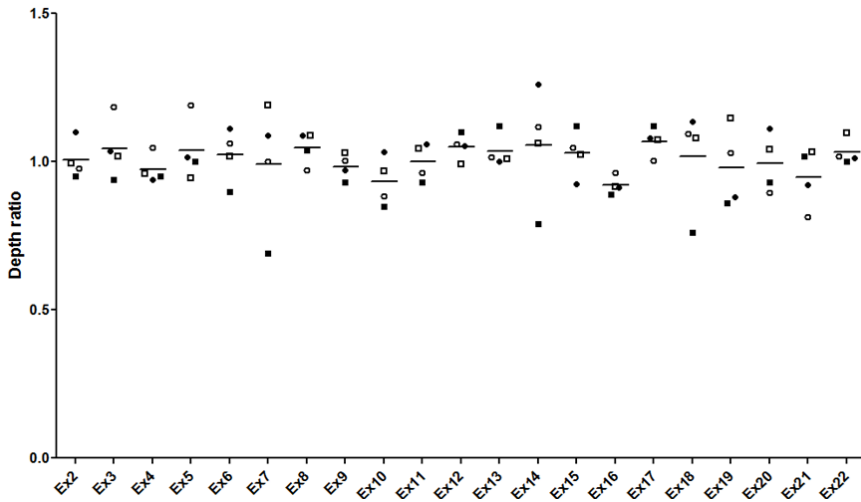

**Figure S3. *TTC12* NGS depth ratio analysis**

*TTC12* copy-number variation analysis in subjects DCP153 (black square), DCP791 (empty square), DCP1606 (black circle), and 18GM00157 (empty circle) by depth ratio analysis of NGS data for each targeted capture probe.

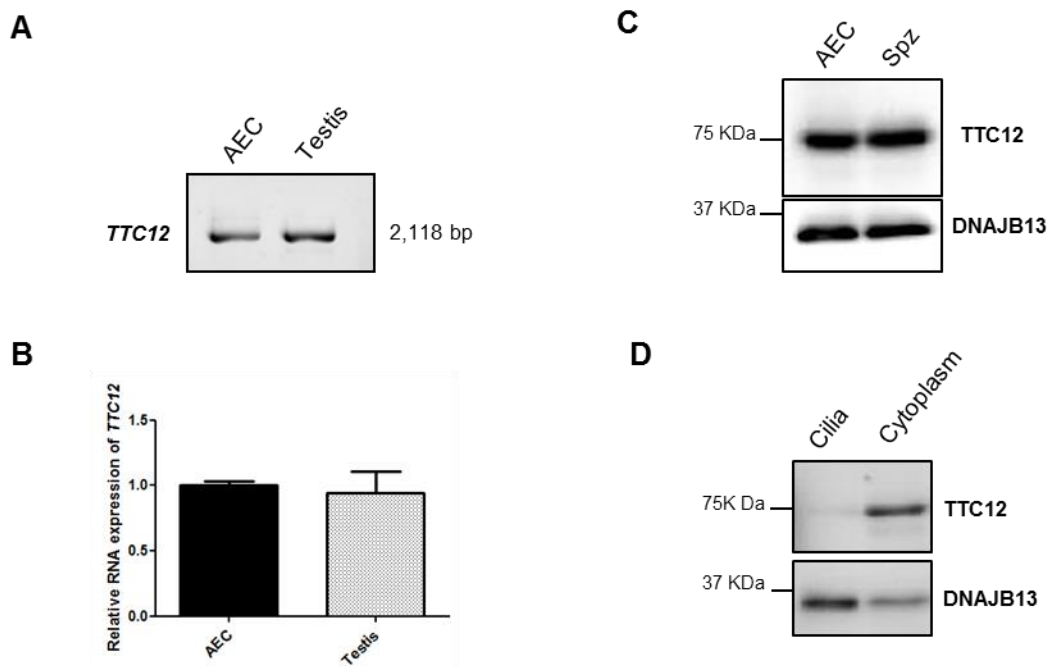

**Figure S4. Expression of *TTC12*/*TTC12* in human airway epithelial cells (AECs) and testis/spermatozoa in subcellular fractions of AECs**

**A)** Analysis of *TTC12* transcripts in AECs and testis by RT-PCR followed by Sanger sequencing showing a unique isoform present in both cell types corresponding to the 705-residue protein (2,118 bp PCR-product, NM\_017868.4).

**B)** Similar levels of *TTC12* transcripts in AECs and testis tissue, as determined by RT-qPCR with *ERCC3* as endogenous control. Data are represented as the mean  $\pm$  SEM with no significant differences using *t*-test,  $p > 0.1$  ( $n=8$ ).

**C)** Detection of the *TTC12* protein in AECs and spermatozoa by western blot. *DNAJB13*, a component of radial spokes, was used as positive control (the expected mass of the *TTC12* protein is 78KDa).

**D)** Cytoplasmic expression of *TTC12* in AECs. AECs were fractionated and analyzed by western blot. *TTC12* appears to be mainly cytoplasmic, whereas *DNAJB13*, a component of radial spokes used as control, was found mainly in the cilia fraction.

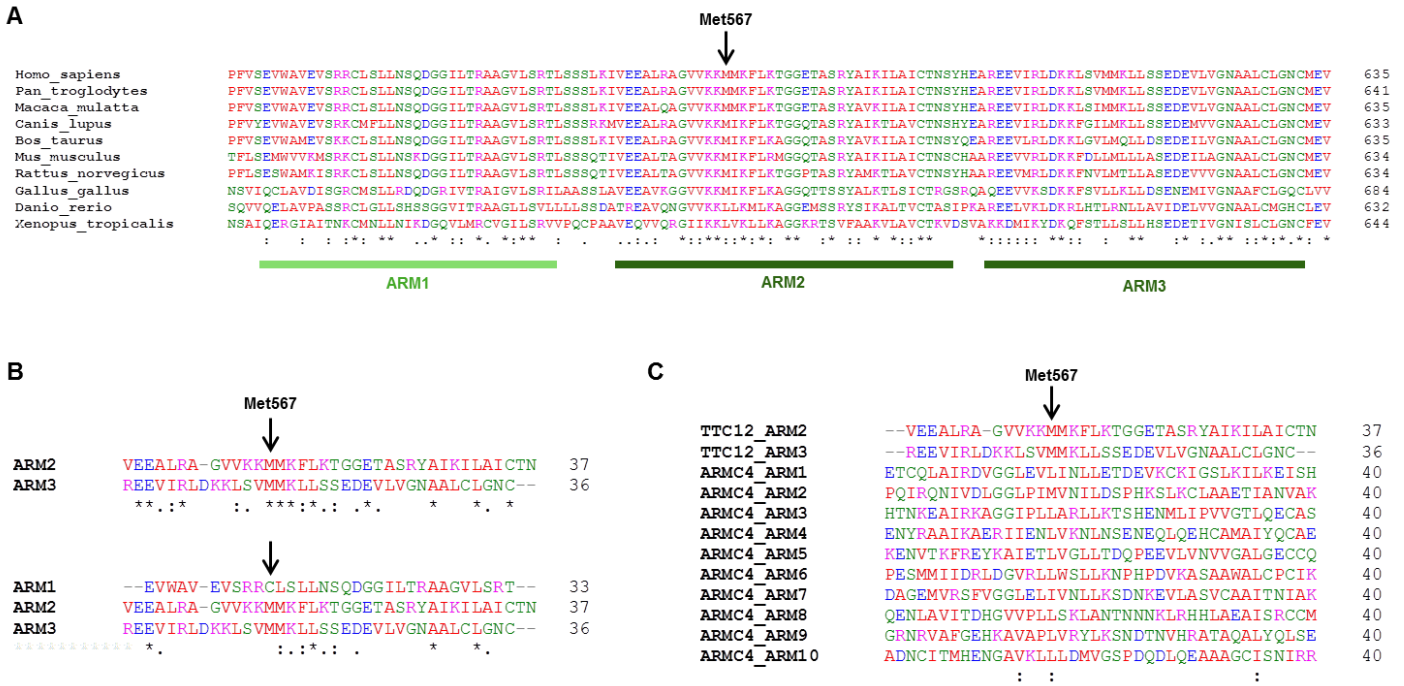

**Figure S5. Evolutionary conservation of TTC12 ARM domains and Met567**

**A)** Partial sequence alignment of TTC12 proteins from several species shows the evolutionary conservation of the three ARM domains, including the Met567-flanking region located in ARM2 (residue mutated in individual DCP153). The dark green lines represent conserved domains ARM2 and ARM3; the light green line represents the degenerated ARM1 domain.

**B)** Sequence alignment of TTC12 ARM2 and ARM3 domains compared to the alignment of ARM1, ARM2 and ARM3 domains confirms the high homology between ARM2 and ARM3 as compared to the degenerated ARM1 domain that has lost 7 of the 11 fully conserved residues found in ARM2 and ARM3. The Met567 residue in the ARM2 domain is conserved in the ARM3 domain.

**C)** Sequence alignment of TTC12 ARM2 and ARM3 domains with the 10 ARM domains found in ARMC4 (PCD gene) shows the conservation of a hydrophobic residue at position corresponding to Met567 in TTC12.

Fully conserved residue (\*); residues with strongly similar properties (:); residues with similar properties (.)

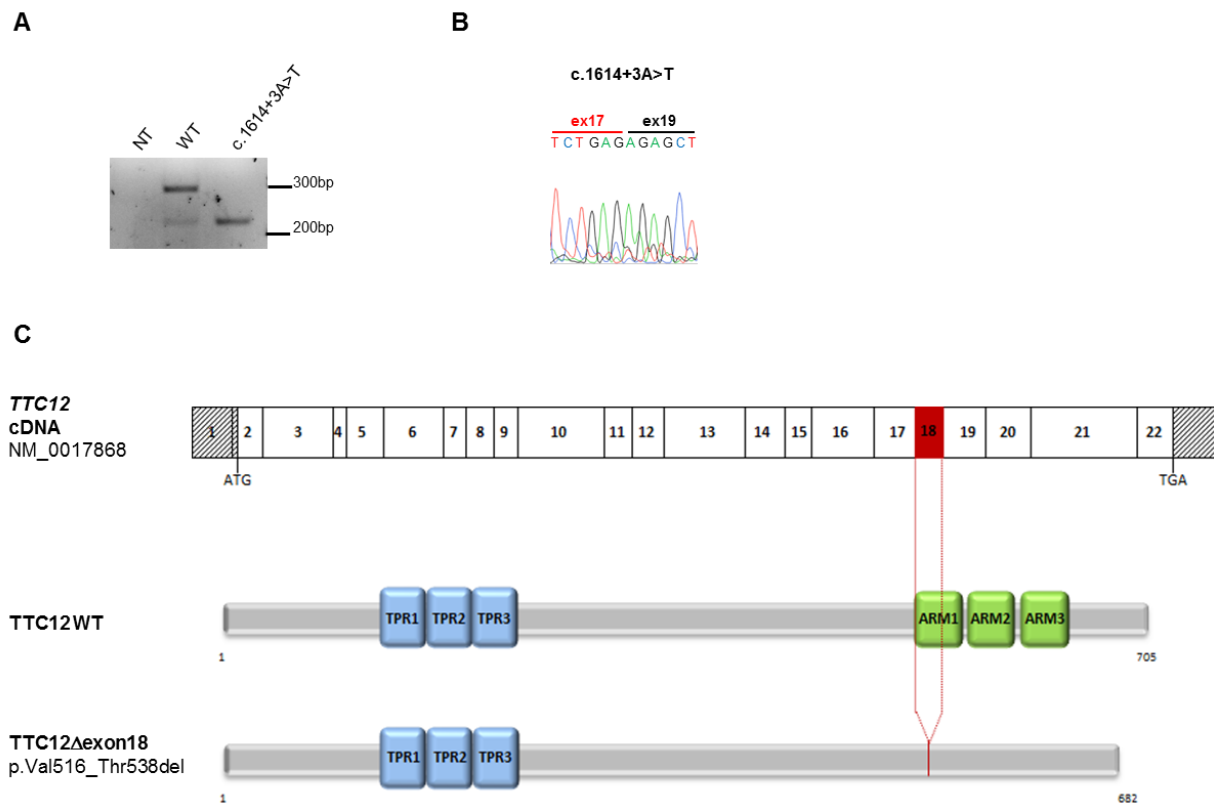

**Figure S6. The *TTC12* c.1614+3A>T mutation identified in individual DCP791: Functional consequences on *TTC12* RNA splicing and predicted impact at the protein level**

**A)** RT-PCR amplification of *TTC12* transcripts obtained from HEK293 cells transfected with a minigene containing a genomic DNA region spanning exons 17 to 19 of *TTC12*, with or without the c.1614+3A>T mutation. A representative gel picture shows bands corresponding to fully spliced *TTC12* transcripts (296 bp) and a smaller molecular species (227 bp) corresponding to *TTC12* transcripts lacking exon 18 (*TTC12*-Δexon18). The low amounts of *TTC12*-Δexon18 transcripts also detected with the WT construct may result from the strong overexpression of the minigene in this transient expression study. NT: non-transfected cells

**B)** Sanger sequencing of RT-PCR products generated from HEK293 cells transfected with the mutated *TTC12* minigene confirming the complete skipping of exon 18 in *TTC12* transcripts.

**C)** Schematic representation of the predicted impact of exon 18 skipping at the protein level. Exonic organization of the human *TTC12* cDNA (top) and domain-organization model of wild-type *TTC12* and



TTC12 deleted from the domain encoded by exon 18 (bottom) according to CDD NCBI database. No ARM domain is predicted in the TTC12 protein lacking amino acids encoded by exon18. TPR: tetratricopeptide repeat; ARM: armadillo repeat.

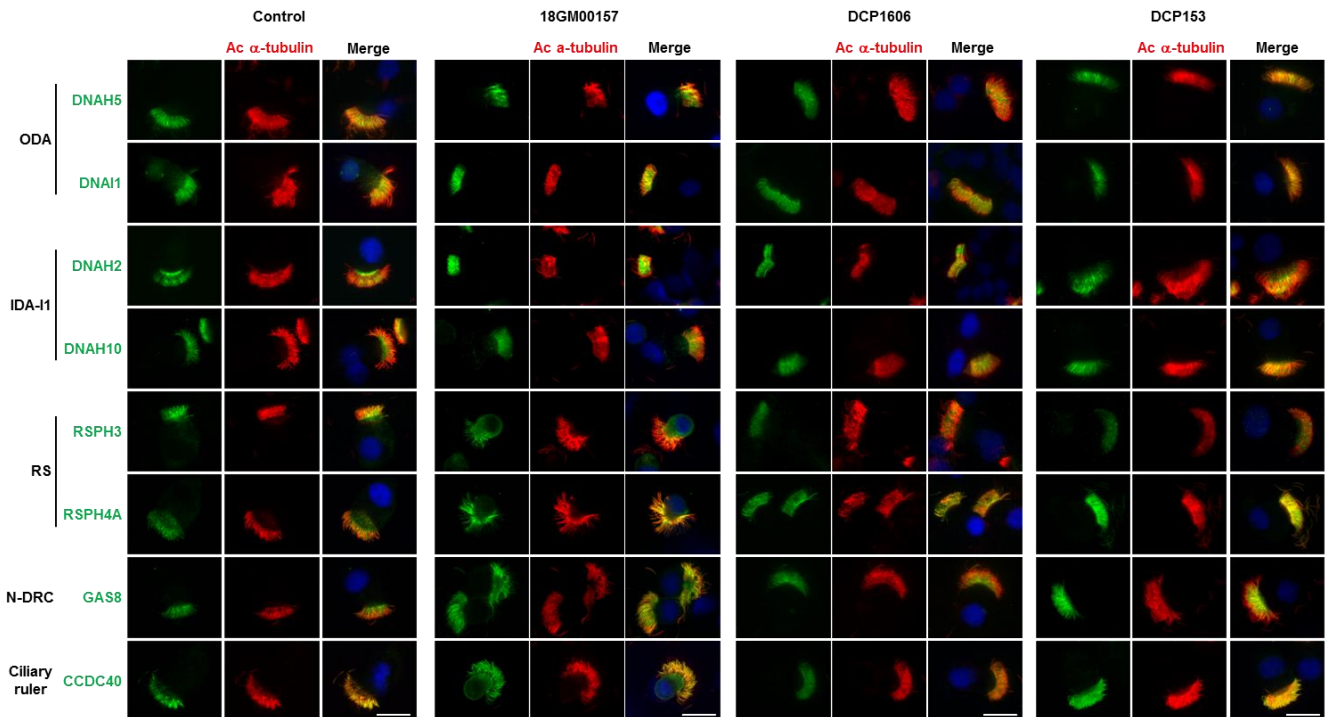

**Figure S7. Expression of ODA, IDA, RS, N-DRC and ciliary ruler markers in AECs from individuals with *TTC12* mutations**

Immunofluorescence microscopy analyses of airway epithelial cells from PCD individuals 18GM00157, DCP1606 and DCP153 are shown. Immunostaining of the main axonemal component markers (all in green) and of acetylated  $\alpha$ -tubulin (in red) shows a normal expression and localization of all the components tested. Nuclear staining was performed with DAPI (blue). Scale bars, 25  $\mu$ m. ODA: outer dynein arms; IDA: inner dynein arms; RS: radial spokes; N-DRC: nexin-dynein regulatory complex.

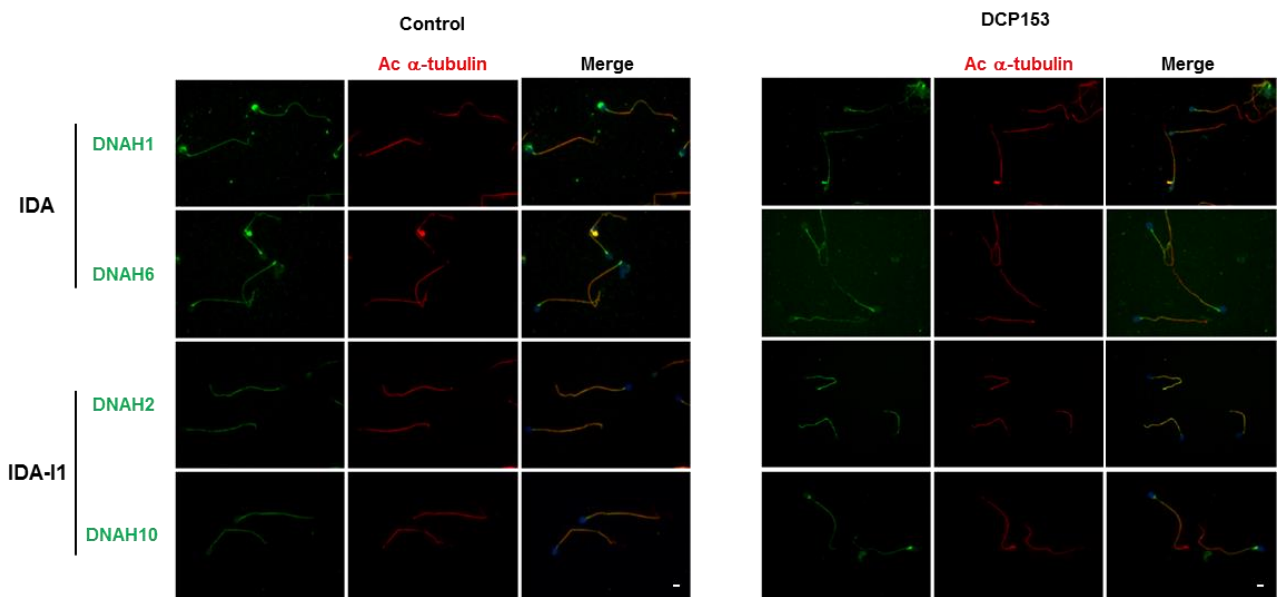

**Figure S8. Expression of IDA and IDA-I1 markers in spermatozoa from individual DCP153**

Immunofluorescence microscopy analyses in spermatozoa from the infertile PCD individual DCP153. Immunostaining with anti-DNAH1 and anti-DNAH6 antibodies (markers of IDA subspecies d and g, respectively) and anti-DNAH2 and anti-DNAH10 antibodies (markers of IDA-I1), all in green, together with  $\alpha$ -tubulin (in red) shows a normal expression and localization of all the components tested. Nuclear staining was performed with DAPI (blue). Scale bars, 5  $\mu$ m. IDAs: inner dynein arms.

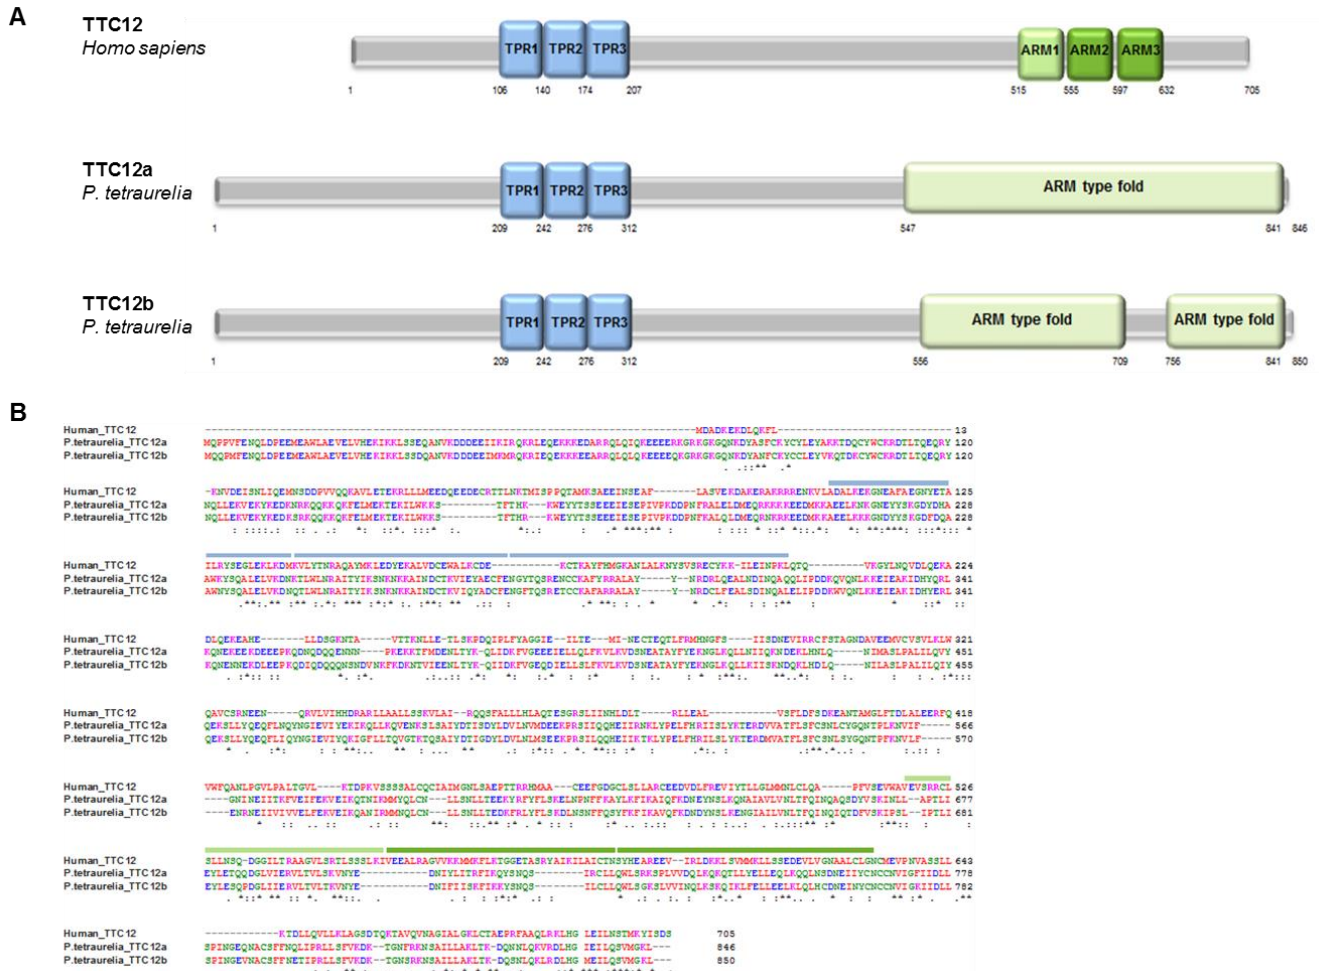

**Figure S9. Orthologs of human TTC12 in *Paramecium tetraurelia***

**A)** Domain organization model of human TTC12 protein compared to TTC12a and TTC12b from *P. tetraurelia*, according to SMART webtool, CDD NCBI database and Interpro software. TTC12a and TTC12b are two closely related paralogs resulting from the last two whole-genome duplications.

**B)** TTC12 protein interspecies alignments from ClustalOmega. Fully conserved residue (\*); residues with strongly similar properties (:); residues with similar properties (.)

**A**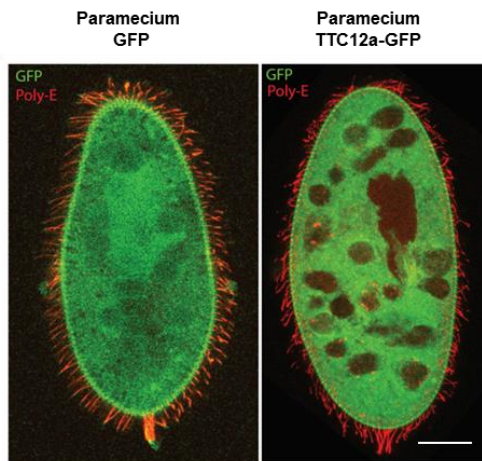**B**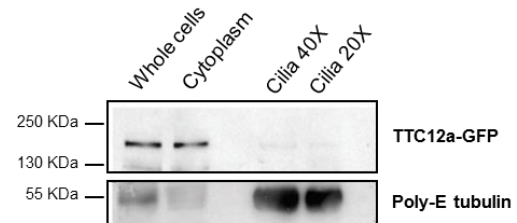

**Figure S10. Localization of TTC12a in *Paramecium tetraurelia***

**A)** Paramecia expressing either GFP (left panel) or TTC12a-GFP (right panel) show a very high level of cytoplasmic GFP staining. Scale bar, 20  $\mu\text{m}$ .

**B)** Cytoplasmic expression of TTC12a in paramecia. Protein extracts from whole cells, cytoplasm (cell body of deciliated cells) or cilia fraction of the same cells loaded with a 40- or 20-fold excess of cilia (40X, 20X), were probed with anti-GFP and anti-Poly-E tubulin antibodies. TTC12a is present in the cytoplasm, whereas the protein is almost not detected in the cilia fraction.

**A**

|        | Position | Sequence             | Efficiency |
|--------|----------|----------------------|------------|
| gRNA 1 | Exon 3   | AAAGAGACTACTGCTTATGG | 82%        |
| gRNA 2 | Exon 3   | ACTGCTTATGGAGGAAGACC | 60%        |

**B**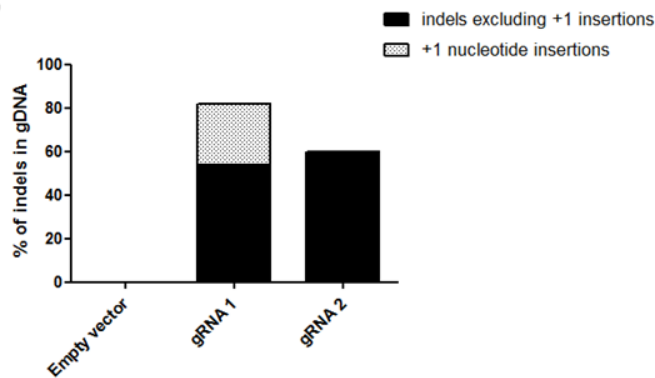**C**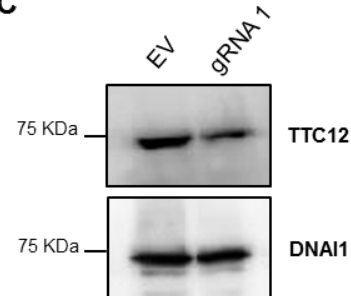

**Figure S11. Insertions and deletions (indels) in *TTC12*-CRISPR transduced AECs**

**A)** Sequence, position and efficiency of two CRISPR guides targeting *TTC12*.

**B)** Percentage of insertions and deletions (indels) in the genomic DNA of *TTC12*-CRISPR AECs compared to control AECs (transduced with an empty vector). Sanger sequencing was performed and analyzed with the TIDE webtool. Guide 1 has a better efficiency (82% of indels) than guide 2 (60% of INDELS). Grey = proportion of +1 single nucleotide insertions (28% with guide 1, and 1% with guide 2).

**C)** Western blot of cells lysates from AECs in which *TTC12* has or not been invalidated by a CRISPR-Cas9 approach, showing a decreased expression of *TTC12* in the invalidated culture.

gDNA: genomic DNA; AECs: airway epithelial cells; EV: empty vector.

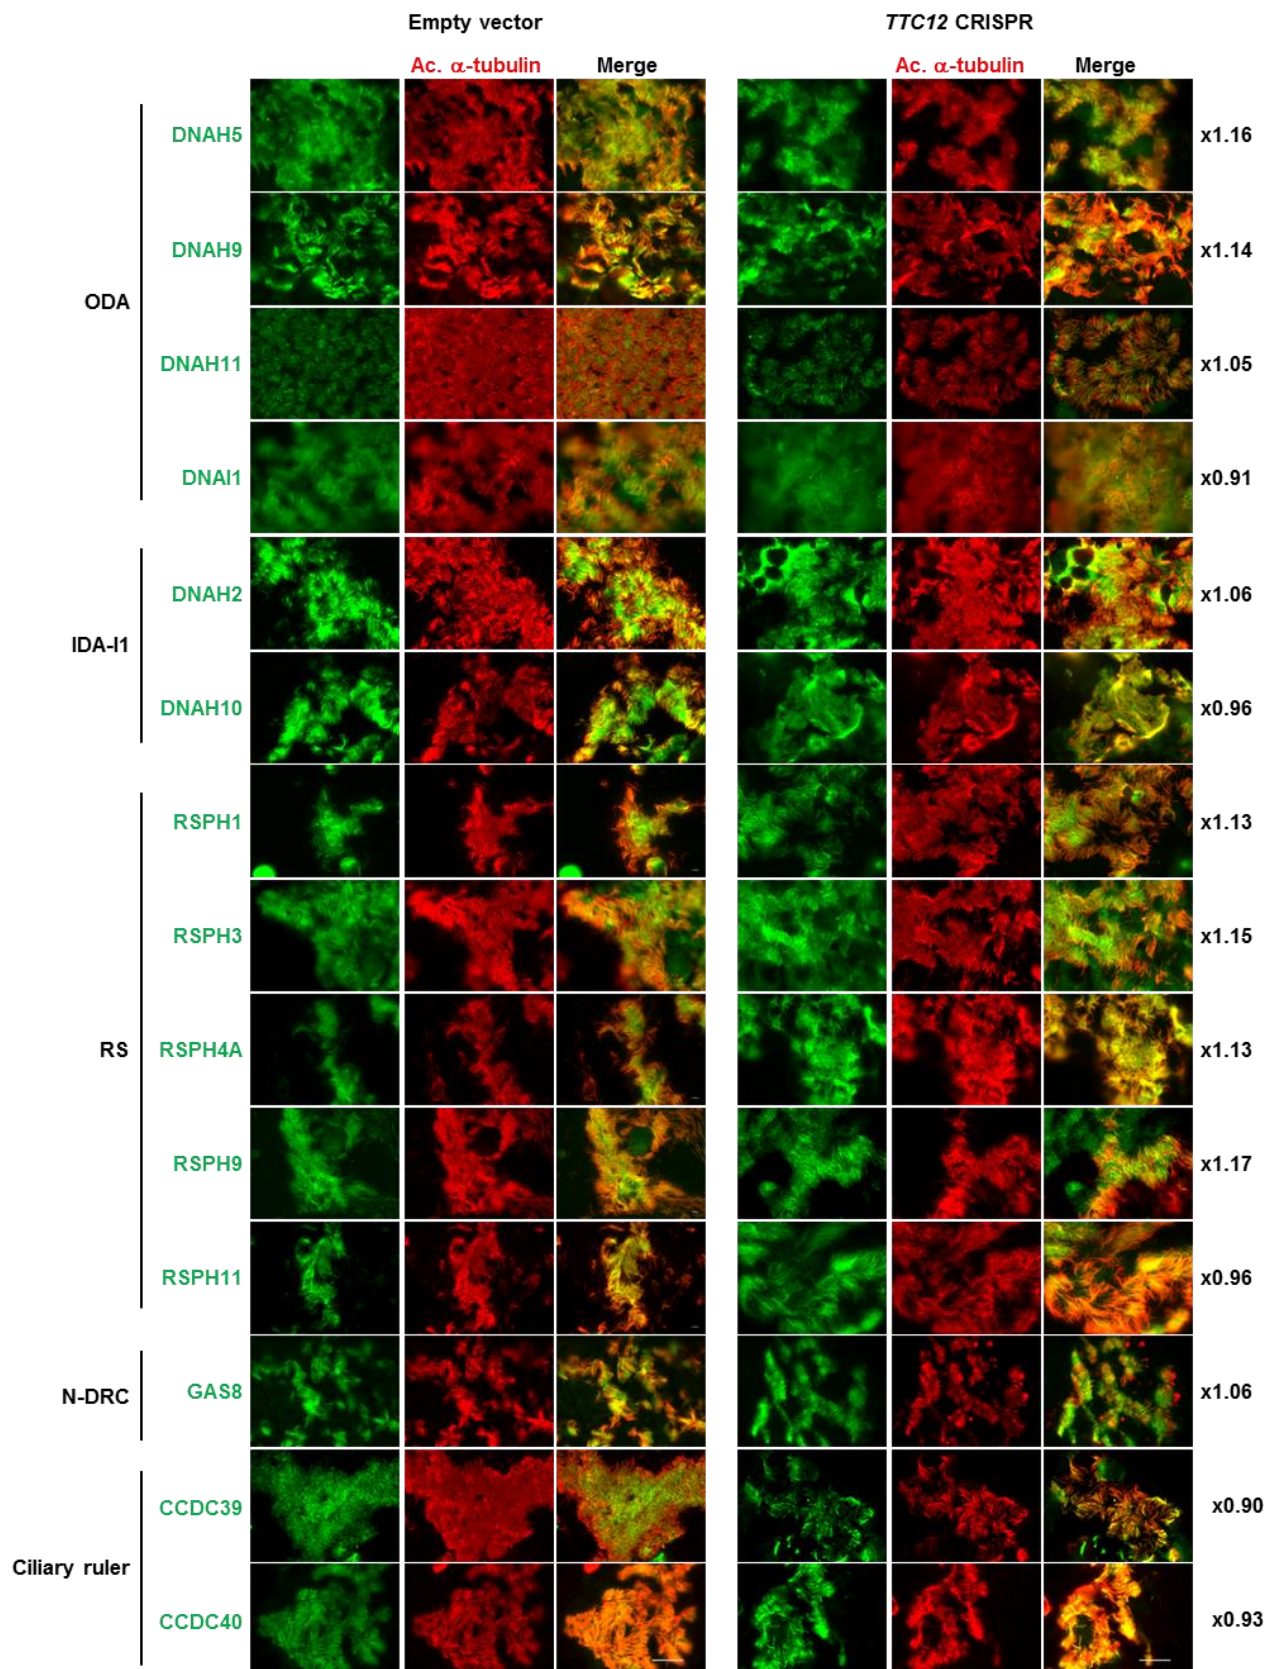

Figure S12. Expression of ODA, IDA, RS, N-DRC and ciliary ruler markers in AEC cultures in which *TTC12* has or not been invalidated by a CRISPR-Cas9 approach

Immunostaining of the main axonemal component markers (all in green) and of the acetylated  $\alpha$ -tubulin (in red) in AECs invalidated for *TTC12* shows an expression similar to that found in native AECs. Scale bars, 25  $\mu$ m. Green labeled areas were measured with ImageJ software and normalized against the tubulin labeled area (red). The dynein/tubulin ratios obtained in *TTC12*-CRISPR transduced cells were then normalized to ratios obtained in EV-transduced cells before. Values of those final ratios are indicated on the right side of the figure and showed no differences between green and red labels.

ODA: outer dynein arm; IDA: inner dynein arm; RS: radial spoke; N-DRC: nexin-dynein regulatory complex;

EV: empty vector.



Table S1: Primers sequences

| <b>PCR and Sanger sequencing</b>                   |                           |                              |
|----------------------------------------------------|---------------------------|------------------------------|
| <b>Name</b>                                        | <b>Sequence</b>           | <b>PCR product size (bp)</b> |
| TTC12_ex9F                                         | ACTGGGAGCAGGAGGAGG        | 315                          |
| TTC12_ex9R                                         | GACCCAAGTGTGCAGGAAAG      |                              |
| TTC12_ex18F                                        | TTAGGGGAGACAGACATGGG      | 465                          |
| TTC12_ex18R                                        | GGACACAGCAAGGAGGTCAC      |                              |
| TTC12_ex19F                                        | TGGCAAGGGGCTATGATTAC      | 448                          |
| TTC12_ex19R                                        | AAGCAAATCCCTATCCAAGAAG    |                              |
| <b>Reverse-Transcription PCR and Real Time PCR</b> |                           |                              |
| <b>Name</b>                                        | <b>Sequence</b>           | <b>PCR product size (bp)</b> |
| TTC12exon2_ATG                                     | GATTCCGGTTCACAATGGATGC    | 2118 (NM_017868.4)           |
| TTC12exon22_STOP                                   | TTAGCATAGGAACAACACACGGT   |                              |
| QPCR_TTC12-Ex11F                                   | TGACAACGAGGTCATAAGAAGG    | 68                           |
| QPCR_TTC12-Ex12R                                   | CAGACCATTCTTCAACTGCAT     |                              |
| QPCR_ERCC3-Ex9F                                    | ACTGGATGGAGCTGCAGAAT      | 70                           |
| QPCR_ERCC3-Ex10R                                   | GACATAGGGCACCAGACCTC      |                              |
| <b>Minigene construct</b>                          |                           |                              |
| <b>Name</b>                                        | <b>Sequence</b>           | <b>PCR product size (bp)</b> |
| MinigeneTTC12_17F                                  | ATGTGTCTTCAGGCTCCCTTTGT   | 3035                         |
| MinigeneTTC12_19R                                  | TCACAAGGCCTCCTCAACAATTT   |                              |
| pCDNA3topo_3'UTR_F                                 | GAGCTCGGATCCACTAGTCC      | 296                          |
| pCDNA3topo_5'UTR_R                                 | GGAGAGGGTTAGGGATAGGC      |                              |
| <b>Guides RNA and on-target PCR</b>                |                           |                              |
| <b>Name</b>                                        | <b>Sequence</b>           | <b>PCR product size (bp)</b> |
| TTC12gRNA1_lentiCRISPRv2F                          | CACCGAAAGAGACTACTGCTTATGG | /                            |
| TTC12gRNA1_lentiCRISPRv2R                          | AAACCCATAAGCAGTAGTCTCTTTC |                              |
| TTC12gRNA2_lentiCRISPRv2F                          | CACCGACTGCTTATGGAGGAAGACC | /                            |
| TTC12gRNA2_lentiCRISPRv2R                          | AAACGGTCTTCTCCATAAGCAGTC  |                              |
| PCR_On-target_F                                    | TGACCCAGTTGTGCAACAGA      | 364                          |

Table S2: Antibodies used for immunofluorescence microscopy studies

| Antibody                                      | Localization                             | Host   | Clonality  | Company | Reference       | Dilution |          |
|-----------------------------------------------|------------------------------------------|--------|------------|---------|-----------------|----------|----------|
|                                               |                                          |        |            |         |                 | Cilia    | Flagella |
| <b><math>\alpha</math> acetylated tubulin</b> | Microtubulin doublets                    | mouse  | monoclonal | Sigma   | (6-11-B1) T6793 | 1/600    | /        |
| <b><math>\alpha</math> tubulin</b>            | Microtubulin doublets                    | mouse  | monoclonal | Sigma   | T9026           | /        | 1/500    |
| <b>CCDC39</b>                                 | Ciliary ruler (IDA-RS-NDRC linker)       | rabbit | polyclonal | Sigma   | HPA035364       | 1/400    | /        |
| <b>CCDC40</b>                                 | Ciliary ruler (IDA-RS-NDRC linker)       | rabbit | polyclonal | Sigma   | HPA022974       | 1/500    | /        |
| <b>DNAH1</b>                                  | IDA heavy chain, subspecies d            | rabbit | polyclonal | Sigma   | HPA036805       | 1/50     | 1/25     |
| <b>DNAH2</b>                                  | IDA-I1 heavy chain                       | rabbit | polyclonal | Sigma   | HPA067103       | 1/100    | 1/50     |
| <b>DNAH3</b>                                  | IDA heavy chain, subspecies a? b? c? e?  | rabbit | monoclonal | Abcam   | ab172632        | 1/50     | 1/50     |
| <b>DNAH5</b>                                  | ODA g heavy chain                        | rabbit | polyclonal | Sigma   | HPA037470       | 1/200    | NR       |
| <b>DNAH6</b>                                  | IDA heavy chain, subspecies g            | rabbit | polyclonal | Sigma   | HPA036391       | 1/50     | 1/50     |
| <b>DNAH8</b>                                  | ODA g heavy chain                        | rabbit | polyclonal | Sigma   | HPA028447       | NR       | 1/2000   |
| <b>DNAH9</b>                                  | ODA b heavy chain, distal                | rabbit | polyclonal | Sigma   | HPA052641       | 1/150    | NR       |
| <b>DNAH10</b>                                 | IDA-I1 heavy chain                       | rabbit | polyclonal | Sigma   | HPA039066       | 1/150    | 1/50     |
| <b>DNAH11</b>                                 | ODA b heavy chain, proximal              | rabbit | polyclonal | Sigma   | HPA045880       | 1/75     | NR       |
| <b>DNAH12</b>                                 | IDA heavy chain, subspecies a? b? c? e?  | rabbit | polyclonal | Sigma   | HPA058203       | 1/50     | 1/50     |
| <b>DNAH17</b>                                 | ODA b heavy chain, distal                | rabbit | polyclonal | Sigma   | HPA024354       | NR       | 1/200    |
| <b>DNAI1</b>                                  | ODA intermediate chain                   | rabbit | polyclonal | Sigma   | HPA021649       | 1/300    | 1/200    |
| <b>DNALI1</b>                                 | IDA associated protein, subspecies a/c/d | rabbit | polyclonal | Sigma   | HPA028305       | 1/150    | 1/100    |
| <b>GAS8</b>                                   | DRC4                                     | rabbit | polyclonal | Sigma   | HPA041311       | 1/300    | /        |
| <b>RSPH1</b>                                  | Radial Spoke Head                        | rabbit | polyclonal | Sigma   | HPA017382       | 1/100    | /        |
| <b>RSPH11</b>                                 | Radial Spoke Stalk                       | rabbit | polyclonal | Sigma   | HPA039193       | 1/200    | /        |
| <b>RSPH3</b>                                  | Radial Spoke Stalk                       | rabbit | polyclonal | Novus   | NBP1-84244      | 1/100    | /        |
| <b>RSPH4A</b>                                 | Radial Spoke Head                        | rabbit | polyclonal | Sigma   | HPA031196       | 1/200    | /        |
| <b>RSPH9</b>                                  | Radial Spoke Head                        | rabbit | polyclonal | Sigma   | HPA031703       | 1/200    | /        |

NR: Not Relevant

Table S3: Position and length of DNA segments used in paramecia feeding experiments

| Gene          | Position            | Length (bp) |
|---------------|---------------------|-------------|
| <i>TTC12a</i> | [471-745]           | 275         |
| <i>TTC12b</i> | [471-588]-[613-745] | 251         |

Table S4: High-speed videomicroscopy parameters

| Individuals                       | Beating cilia (%) | CBF (Hz)   | Angle (°)  | Distance travelled by the cilium tip (µm/sec) |
|-----------------------------------|-------------------|------------|------------|-----------------------------------------------|
| <b>18GM00157</b>                  | 30                | 10 ± 3.3   | 50 ± 24    | 57.3 ± 42.4                                   |
| <b>DCP1606</b>                    | 50                | 11.4 ± 5.4 | 31 ± 21    | 36.9 ± 26.2                                   |
| <b>DCP153</b>                     | 90                | 6.3 ± 2.0  | 50 ± 22    | 39.1 ± 43.2                                   |
| Controls (mean ± SD) <sup>a</sup> | 91 ± 13           | 8.9 ± 2.0  | 71.6 ± 6.6 | 66.7 ± 14.2                                   |
| P <sup>b</sup> , n=15             | 0.027             | ns         | 0.002      | 0.04                                          |

CBF: ciliary beat frequency, SD: standard deviation, ns: not significant. Angle and distance travelled were evaluated on beating cilia.

<sup>a</sup>According to the normal values published in reference<sup>1</sup>

<sup>b</sup>using the Mann-Whitney U test, with 15 individuals with non PCD bronchiectasis; p<0.05 was considered as significant.

Table S5: Allele frequency of *TTC12* mutations identified in individuals

| Individuals      | Genomic position (Grch37) | Mutation                 | Exon      | Mutation type             | GnomAD allele frequency (mutated/total allele number) | Number of homozygotes |
|------------------|---------------------------|--------------------------|-----------|---------------------------|-------------------------------------------------------|-----------------------|
| <b>DCP1606</b>   | chr11:113209524           | c.607del<br>p.Ile203*    | 9         | Nonsense                  | 0                                                     | 0                     |
| <b>DCP791</b>    | chr11:113230733           | c.1614+3A>T<br>p.?       | Intron 18 | Splice (exon 18 skipping) | 0                                                     | 0                     |
| <b>18GM00157</b> | chr11:113233186           | c.1678C>T<br>p.Arg560*   | 19        | Nonsense                  | 4x10 <sup>-5</sup><br>(14/282804)                     | 0                     |
| <b>DCP153</b>    | chr11:113233208           | c.1700T>G<br>p.Met567Arg | 19        | Missense                  | 6x10 <sup>-5</sup><br>(17/282758)                     | 0                     |

Table S6: Expression pattern of *Paramecium tetraurelia* *TTC12* genes

| Gene          | Accession number                   | Expression pattern <sup>a</sup> |                         | Protein length | Identity (%) |
|---------------|------------------------------------|---------------------------------|-------------------------|----------------|--------------|
|               |                                    | Life cycle                      | Deciliation/Reciliation |                |              |
| <i>TTC12a</i> | <a href="#">PTET.51.1.G1640129</a> | High                            | Overexpressed           | 846 residues   | 83.45        |
| <i>TTC12b</i> | <a href="#">PTET.51.1.G1420106</a> | Basal                           | Not modified            | 850 residues   |              |

<sup>a</sup>according to *ParameciumDB*

## SUPPLEMENTAL MATERIAL AND METHODS

### High-speed videomicroscopy

Ciliated samples were obtained by nasal brushing with a 2 mm cytology brush (Laboratoires Gyneas). Cells were suspended in B1 BSA medium (CCD Lab) and examined within three hours after sampling. All observations were performed at room temperature with an inverted microscope (Axiovert 200, Carl Zeiss S.A.S.) with an oil immersion x100 objective, and within 20 min. Beating ciliated edges were recorded with a digital camera (PixelINK A741) at a rate of 355 frames per second. Each movie was composed of 1,800 frames with a definition of 256 × 192 pixels. Pixel size was (0.13 × 0.13)  $\mu\text{m}^2$ . Twenty distinct areas containing intact undisrupted ciliated epithelial edges devoid of mucus and beating in the plane of the camera were recorded. Qualitative and quantitative evaluations of ciliary beat patterns were performed as previously described<sup>1</sup>. Briefly, 10 beating cilia individualized were followed during a complete beating cycle (one cilium selected per video/edges) in order to measure the following parameters: ciliary beat frequency (CBF), beating angle and distance travelled by the cilium tip per second. These results were compared to a disease control group previously published (i.e., 15 individuals with non-PCD bronchiectasis<sup>1</sup>) using the Mann-Whitney U test;  $p < 0.05$  was considered as significant.

### Quantitative RT-PCR

One microgram of total RNA from airway cells at cultured at air-liquid interface or testis tissue (Takara Bio Europe/Clontech) was extracted using the RNeasy Mini Kit (Qiagen) and then subjected to reverse transcription with the Reverse Transcriptase kit (Roche) following the manufacturer's instructions. The real-time PCR assays were performed in the Light Cycler LC480 (Roche) with the mesablue qPCR mastermix Plus for Sybr Assay (Eurogentec). *ERCC3*, an ubiquitously expressed gene, was used as an endogenous control to normalize the data and determine the relative expression between AECs and testis by calculating the primer efficiency<sup>- $\Delta\Delta\text{Ct}$</sup> . The primers used are listed in **Table S1**.

### **Cilia isolation from ALI cultures**

After more than 21 days of culture of AECs in ALI conditions (as indicated above), cilia isolation was performed as described<sup>2</sup>. Briefly, the apical surface of AEC cultures was washed two times with PBS before being gently swirled with a deciliation buffer (10mM Tris-HCL pH7.5, 50mM NaCl, 10mM CaCl<sub>2</sub>, 1mM EDTA, 0.1% Triton X100, 7mM Bmercaptoethanol, 1% Protease inhibitor). The cilia fraction was collected and first centrifugated 1 min at 1000 g at 4°C, then 5 min at 12000g at 4°C to gather all cilia that were then resuspended in resuspension buffer (30mM HEPES pH7.3, 25mM NaCl, 5mM MgSO<sub>4</sub>, 1mM EGTA, 0.1mM EDTA, 1mM DTT, 1% protease inhibitor). The fraction remaining on the insert was considered as the cytoplasmic part. Both fractions were suspended in ice-cold lysis buffer to perform immunoblotting as described in the Material and Methods section of the main text.

### **Minigene constructs and *in vitro* expression**

Genomic DNA was extracted from blood obtained from a healthy control and from DCP791 individual carrying the c.1614+3A>T splice site mutation. A region spanning exons 17 to 19 containing or not the c.1614+3A>T transversion was amplified by PCR from those genomic DNAs and cloned into pcDNA3.1/V5-His-TOPO using the TOPO TA cloning kit (Thermofischer Sc.) according to the manufacturer's recommendations.

Constructs were checked by Sanger sequencing before being transfected in HEK293 cells with FuGENE<sup>®</sup> HD Transfection Reagent (Promega). Total RNA was extracted with RNeasy Mini Kit (Qiagen) before being treated with Dpn1 to eliminate the bacterial plasmid. Reverse transcription was then performed with the Reverse Transcriptor kit (Roche) following the manufacturer's instructions. To avoid the amplification of HEK293 endogenous *TTC12* transcripts, PCR was performed with primers located in the plasmidic 5' and 3' untranslated regions flanking the *TTC12* gene fragment. All primers used are listed in **Table S1**.

### **CRISPR-cas9 guides design and lentiviral vector construct**

Oligonucleotides coding for guide RNAs that target the third exon of *TTC12* were designed with the [crispor.tefor.net](http://crispor.tefor.net) webtool. We selected two guides, consisting of 20-bp sequences followed by NGG PAM of the CRISPR/SpCas9, that combined the higher specificity score associated with the lower out-of-frame score. We previously checked the absence of off-targets in introns or exons of genes known to be implicated in PCD, and that all off-targets contained more than three single-nucleotide mismatches. Guides were cloned into plentiCRISPRv2, a gift from Feng Zhang<sup>3</sup> (Addgene plasmid # 52961; <http://n2t.net/addgene:52961>; RRID:Addgene\_52961) according to the original online protocol of the Zhang lab ([https://www.addgene.org/static/data/plasmids/52/52961/52961-attachment\\_B3xTwa0bkYD.pdf](https://www.addgene.org/static/data/plasmids/52/52961/52961-attachment_B3xTwa0bkYD.pdf)). The production of lentiviruses was performed by AniRA Vectorologie (SFR Biosciences Gerland – Lyon Sud). Guides and primers used are listed in **Table S1**.

1. Papon, J.-F., Bassinet, L., Cariou-Patron, G., Zerah-Lancner, F., Vojtek, A.-M., Blanchon, S., Crestani, B., Amselem, S., Coste, A., Housset, B., et al. (2012). Quantitative analysis of ciliary beating in primary ciliary dyskinesia: a pilot study. *Orphanet J Rare Dis* 7, 78.
2. Ostrowski, L.E. (2006). Chapter 14 - Preparation of Cilia from Human Airway Epithelial Cells. In *Cell Biology (Third Edition)*, J.E. Celis, ed. (Burlington: Academic Press), pp. 99–102.
3. Sanjana, N.E., Shalem, O., and Zhang, F. (2014). Improved vectors and genome-wide libraries for CRISPR screening. *Nat Methods* 11, 783–784.
